# Supplementary material
Source: publisher figshare collection journal article supplement (https://acs.figshare.com/ndownloader/files/4188265)

## **Supporting Information**

---

### ***Catalytic Enantioselective Desymmetrization of meso-Glutaric Anhydrides Using a Stable Ni<sub>2</sub>-Schiff Base Catalyst***

Purushothaman Gopinath, Takumi Watanabe,\*  
and Masakatsu Shibasaki\*

*Institute of Microbial Chemistry, Tokyo, Japan*

*twatanabe@bikaken.or.jp; mshibasa@bikaken.or.jp*

---

|                                                                                               |                |
|-----------------------------------------------------------------------------------------------|----------------|
| <b>1. General</b>                                                                             | <b>S2</b>      |
| <b>2. Instrumentation</b>                                                                     | <b>S2</b>      |
| <b>3. Materials</b>                                                                           | <b>S2</b>      |
| <b>4. General Procedure for Catalytic Enantioselective Desymmetrization and HPLC profiles</b> | <b>S3-S10</b>  |
| <b>5. NMR Spectra for all Compounds</b>                                                       | <b>S11-S37</b> |

## 1. General

The reactions were performed in an oven-dried 10 mL test tube with a Teflon-coated magnetic stirring bar unless otherwise noted. All work-up and purification procedures were carried out with reagent-grade solvents under ambient atmosphere.

## 2. Instrumentation

Infrared (IR) spectra were recorded on a JASCO FT/IR 4100 Fourier transform infrared spectrophotometer. NMR ( $^1\text{H}$  NMR: 400 MHz,  $^{13}\text{C}$  NMR: 100 MHz) was recorded on JEOL ECS-400 spectrometers. Chemical shifts for proton are reported in parts per million downfield from tetramethylsilane and are referenced to residual protium in the NMR solvent ( $\text{CDCl}_3$ ;  $\delta$  7.26 ppm). For  $^{13}\text{C}$  NMR, chemical shifts were reported in the scale relative to NMR solvent ( $\text{CDCl}_3$ ;  $\delta$  77.0 ppm) as an internal reference. NMR data are reported as follows: chemical shifts, multiplicity (s: singlet, d: doublet, dd: doublet of doublets, t: triplet, q: quartet, m: multiplet, br: broad signal), coupling constant (Hz), and integration. Optical rotation was measured using a 2 mL cell with a 1.0 dm path length on a JASCO polarimeter P-1030. High-resolution mass spectra (ESI-Orbitrap) were measured on ThermoFisher Scientific LTQ Orbitrap XL. HPLC analysis was conducted on a JASCO HPLC system equipped with Daicel chiral-stationary-phase columns ( $\phi$  0.46 cm  $\times$  25 cm).

## 3. Materials

Unless otherwise noted, materials were purchased from commercial suppliers and were used without purification. THF, diethyl ether, toluene and  $\text{CH}_2\text{Cl}_2$  were purified by passing through a solvent purification system (Glass Contour). Dry  $\text{CHCl}_3$  and  $\text{Ni}_2$ -(Schiff base) catalyst were purchased from Wako Pure Chemical Co. Ltd. (Osaka, Japan) and used as received. 3-Methyl glutaric anhydride was purchased from TCI Chemical Industries Co. Ltd (Tokyo, Japan). 3-Phenyl glutaric acid was purchased from Aldrich and used for the synthesis of anhydride **1c** as reported.<sup>1</sup> Anhydrides **1b**,<sup>2</sup> **1d**,<sup>3</sup> **1e**,<sup>4</sup> and **1g**<sup>5</sup> were synthesized using literature procedure. Anhydride **1f** is not reported and was synthesized using the same procedure as of compound **1e**.

---

(1) Reed, P. E.; Katzenellenbogen, J. A. *J. Med. Chem.* **1991**, *34*, 1162.

(2) Poldy, J.; Peakall, R.; Barrow, R. A. *Tetrahedron Lett.* **2008**, *49*, 2446.

(3) Yamamoto, Y.; Iwasa, M.; Sawada, S.; Oda, J.; *Agric. Biol. Chem.* **1990**, *54*, 3269.

(4) Fryszkowska, A.; Komar, M.; Koszelewski, D.; Ostaszewski, R. *Tetrahedron. Assym.* **2005**, *16*, 2475.

(5) Watanabe, Y.; Yamazaki, T.; Kubota, T.; *Org. Lett.* **2010**, *12*, 268.

**4-(furan-2-yl)dihydro-2H-pyran-2,6(3H)-dione (1f)**

Light yellow solid; mp: 84-86 °C; IR (neat):  $\nu$  1815, 1752, 1508, 1268  $\text{cm}^{-1}$ ;  $^1\text{H}$  NMR ( $\text{CDCl}_3$ ):  $\delta$  7.31 (d,  $J = 1.6$  Hz, 1H), 6.27 (dd,  $J = 2.0$  Hz, 3.2 Hz, 1H), 6.10 (d,  $J = 3.2$  Hz, 1H), 3.51-3.45 (m, 1H), 3.04-2.90 (m, 4H);  $^{13}\text{C}$  NMR ( $\text{CDCl}_3$ ):  $\delta$  165.4, 152.1, 142.8, 110.5, 106.2, 34.5, 28.1; HRMS (ESI- Orbitrap) calcd. for  $\text{C}_9\text{H}_9\text{O}_4$   $m/z$  181.0495  $[\text{M}+\text{H}]^+$ , found 181.0493.

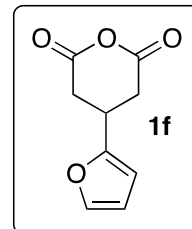**General Procedure for the desymmetrization reaction**

To a oven-dried glass test tube equipped with a magnetic stirring bar was charged the corresponding anhydride (0.2 mmol),  $\text{Ni}_2$ -(Schiff base) ((*R*)-isomer unless otherwise noted, 0.01 mmol, 5 mol%) and  $\text{CHCl}_3$  (0.4 mL, 0.5 M).<sup>a</sup> The reaction mixture was then cooled to the given temperature, followed by the addition of the corresponding alcohol (2 mmol, 10 equiv). The reaction mixture was then stirred for the time as indicated in the table. Dichloromethane (2 mL) was added to the reaction mixture and then extracted with sat.  $\text{NaHCO}_3$  ( $2 \times 2$  mL). The aqueous layer collected was then washed with dichloromethane ( $2 \times 2$  mL) and then acidified to pH = 1.0 using 1N HCl. The compound was then extracted with ethyl acetate ( $3 \times 10$  mL), dried over  $\text{Na}_2\text{SO}_4$  and evaporated under reduced pressure to furnish the compound in very good purity.

<sup>a</sup> In case of anhydride **1g**, 4 mL (0.05 M) of  $\text{CHCl}_3$  was used.

The ee value was determined using chiral HPLC analysis by converting the carboxylic acid to *p*-bromo phenol ester using literature procedure.<sup>6</sup>

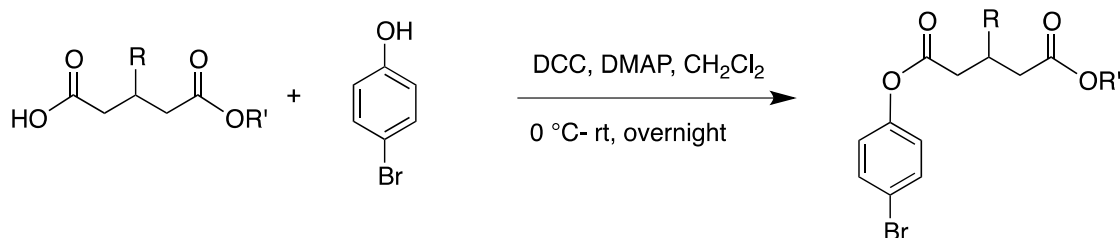

Absolute configuration of **2a**, **2c**, and **2e** was determined by comparing signs of optical rotation (and chiral HPLC profiles for **2a**) with those reported on literature. For the others, it was correlated by analogy.

(6) Manzano, R.; Andrés, J. M.; Muruzábal, M.-D.; Pedrosa, R. *J. Org. Chem.* **2010**, *75*, 5417.

**Methyl (*S*)-3-methylglutarate (2a)** is reported.<sup>6</sup> Yield = 91%; ee = 94%.  $[\alpha]_D^{23} -0.7$  (*c* 0.20, CHCl<sub>3</sub>, 94% ee); HPLC (Daicel CHIRALPAK AD-H,  $\phi$  0.46 cm  $\times$  25 cm, detection 220 nm, *n*-hexane / *i*PrOH = 19/1, flow rate = 1.0 mL/min)  $t_R$  = 9.5 min (major),  $t_R$  = 11.3 min (minor), (lit.<sup>6</sup>  $t_R$  = 9.5 min ((*S*)-isomer),  $t_R$  = 11.3 min ((*R*)-isomer) under the same conditions for HPLC).

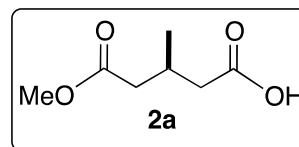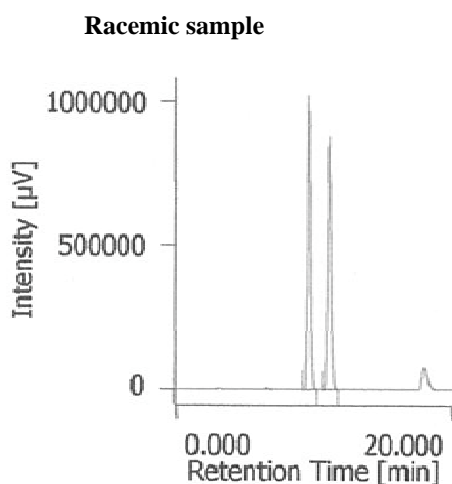

ピーク情報

| ピーク名    | tR [min] | area%  |
|---------|----------|--------|
| Unknown | 9.533    | 50.003 |
| Unknown | 11.008   | 49.997 |

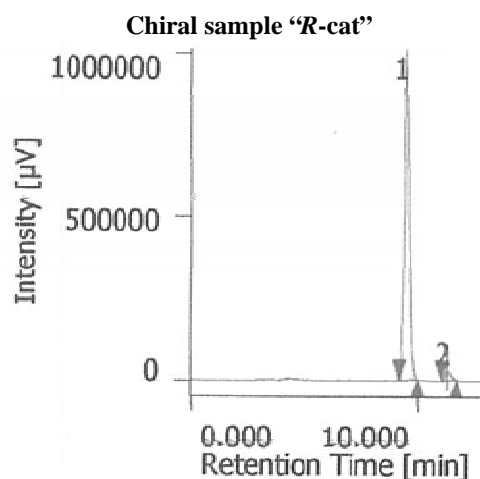

ピーク情報

| ピーク名    | tR [min] | 面積%    |
|---------|----------|--------|
| Unknown | 9.442    | 96.931 |
| Unknown | 11.300   | 3.069  |

**Methyl (*R*)-3-methylglutarate (*ent*-2a)** (product of (*S*)-Ni<sub>2</sub>-(Schiff base)-catalyzed reaction) Yield = 88%; ee = 94%.  $[\alpha]_D^{23} +0.9$  (*c* 0.17, CHCl<sub>3</sub>, 94% ee, ), (lit.<sup>6</sup>  $[\alpha]_D^{25} +0.6$  (*c* 1.0, CHCl<sub>3</sub>, 84% ee)); HPLC (Daicel CHIRALPAK AD-H,  $\phi$  0.46 cm  $\times$  25 cm, detection 220 nm, *n*-hexane / *i*PrOH = 19/1, flow rate = 1.0 mL/min)  $t_R$  = 9.5 min (minor),  $t_R$  = 11.5 min (major).

**Chiral sample "S-cat"**

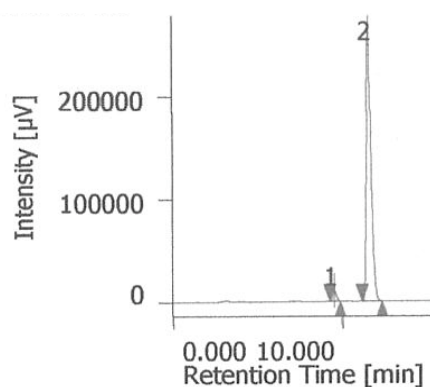

ピーク情報

| ピーク名    | tR [min] | 面積%    |
|---------|----------|--------|
| Unknown | 9.500    | 3.005  |
| Unknown | 11.542   | 96.995 |

**Methyl 3-ethylglutarate (2b)** is reported.<sup>7</sup> Yield = 99%; ee = 90%. HPLC (Daicel CHIRALPAK AD-H,  $\phi$  0.46 cm  $\times$  25 cm, detection 220 nm, *n*-hexane / *i*PrOH = 19/1, flow rate = 1.0 mL/min)  $t_R$  = 9.6 min (major),  $t_R$  = 11.2 min (minor).

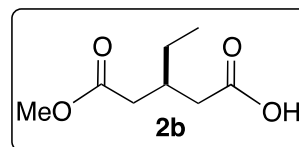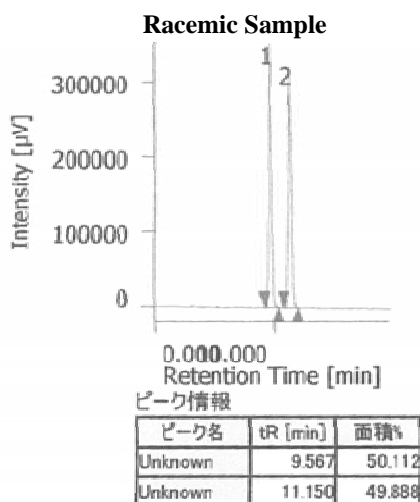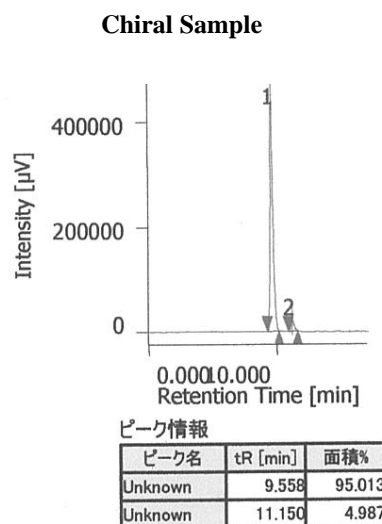

**Methyl (S)-3-phenylglutarate (2c)** is reported.<sup>8</sup> Yield = 93%; ee = 80%.  $[\alpha]_D^{23}$  -2.8 (*c* 0.83, CHCl<sub>3</sub>, 80% ee, ), (lit.<sup>4</sup>  $[\alpha]_D^{20}$  -3.6 (*c* 1.1, CHCl<sub>3</sub>)); HPLC (Daicel CHIRALPAK AD-H,  $\phi$  0.46 cm  $\times$  25 cm, detection 220 nm, *n*-hexane / *i*PrOH = 19/1, flow rate = 1.0 mL/min)  $t_R$  = 17.1 min (major),  $t_R$  = 22.0 min (minor).

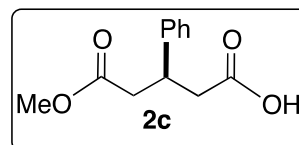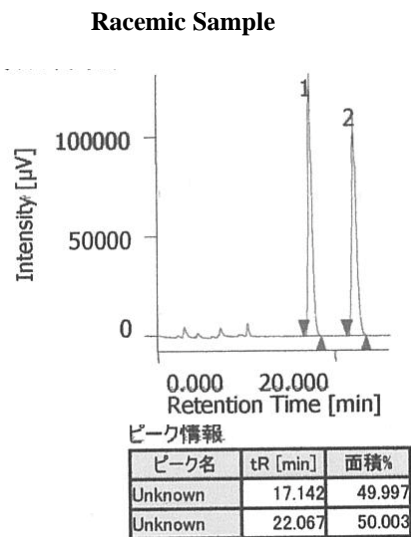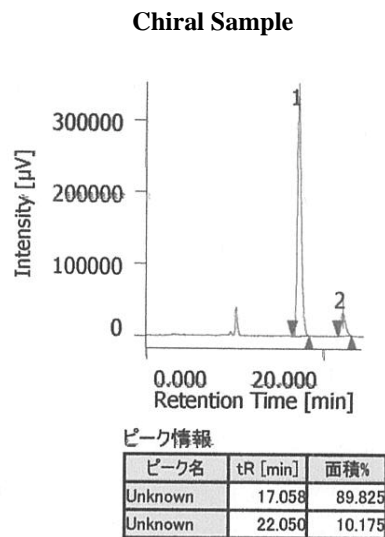

(7) Lam, L. K. P.; Hui, A. H. F.; Jones, J. B. *J. Org. Chem.* **1986**, *51*, 2047.

(8) Park, S. E.; Nam, E. H.; Jang, H. B.; Oh, J. S.; Some, S.; Lee, Y. S.; Song, C. E. *Adv. Synth. Catal.* **2010**, *352*, 2211.

**Methyl 3-methoxyglutarate (2d)**

Colorless oil. Yield = 83%. IR (neat):  $\nu$  3224, 1736, 1613, 1438  $\text{cm}^{-1}$ ;  $^1\text{H}$  NMR ( $\text{CDCl}_3$ ):  $\delta$  4.03-3.97 (m, 1H), 3.64 (s, 3H), 3.34 (s, 3H), 2.63-2.50 (m, 4H);  $^{13}\text{C}$  NMR ( $\text{CDCl}_3$ ):  $\delta$  176.4, 171.3, 74.0, 57.5, 51.8, 38.7, 38.6; HRMS (ESI- Orbitrap) calcd. for  $\text{C}_7\text{H}_{11}\text{O}_5$   $m/z$  175.0601  $[\text{M}-\text{H}]^-$ , found 175.0611.  $[\alpha]_{\text{D}}^{23}$  -2.4 ( $c$  0.20,  $\text{CHCl}_3$ , 83% ee); HPLC (Daicel CHIRALPAK AD-H,  $\phi$  0.46 cm  $\times$  25 cm, detection 220 nm,  $n$ -hexane /  $i$ PrOH = 19/1, flow rate = 1.0 mL/min)  $t_{\text{R}}$  = 13.6 min (major),  $t_{\text{R}}$  = 17.7 min (minor).

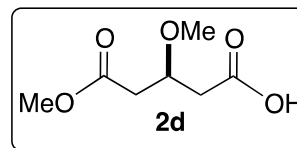**Racemic Sample**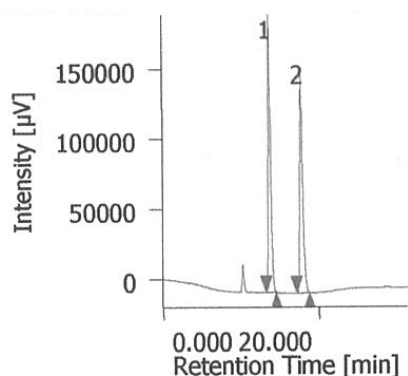

## ピーク情報

| ピーク名    | tR [min] | 面積%    |
|---------|----------|--------|
| Unknown | 13.633   | 50.099 |
| Unknown | 17.667   | 49.901 |

**Chiral Sample**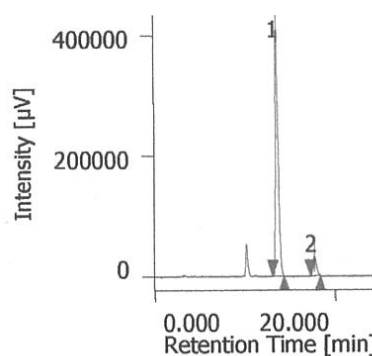

## ピーク情報

| ピーク名    | tR [min] | 面積%    |
|---------|----------|--------|
| Unknown | 13.508   | 91.468 |
| Unknown | 17.617   | 8.532  |

**Methyl (S)-3-(4-fluorophenyl)glutarate (2e) is reported.<sup>7</sup>**

Yield = 92%; ee = 88%.  $[\alpha]_{\text{D}}^{23}$  -2.0 ( $c$  0.49,  $\text{CHCl}_3$ , 88% ee, ), (lit.<sup>4</sup>  $[\alpha]_{\text{D}}^{20}$  -4.3 ( $c$  1.0,  $\text{CHCl}_3$ )); HPLC (Daicel CHIRALPAK AD-H,  $\phi$  0.46 cm  $\times$  25 cm, detection 220 nm,  $n$ -hexane /  $i$ PrOH = 9/1, flow rate = 1.0 mL/min)  $t_{\text{R}}$  = 13.3 min (major),  $t_{\text{R}}$  = 16.6 min (minor)

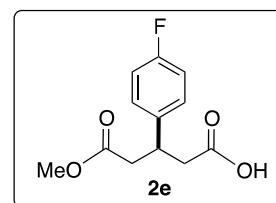**Racemic Sample**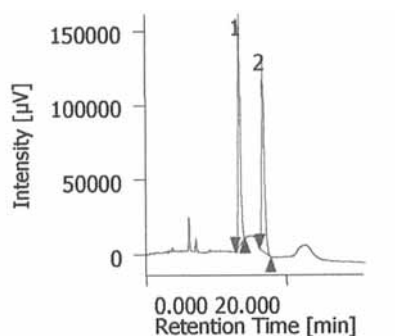

| ピーク名    | tR [min] | 面積%    |
|---------|----------|--------|
| Unknown | 13.250   | 49.939 |
| Unknown | 16.592   | 50.061 |

**Chiral sample**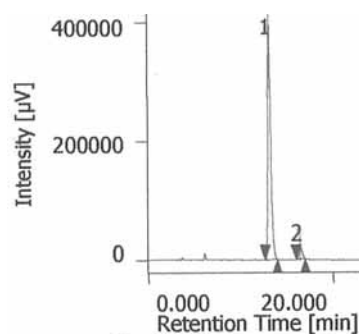

| ピーク名    | tR [min] | 面積%    |
|---------|----------|--------|
| Unknown | 13.083   | 93.907 |
| Unknown | 16.383   | 6.093  |

**Methyl 3-(furan-2-yl)glutarate (2f)**

Colorless oil. Yield = 85%. IR (neat):  $\nu$  3122, 1737, 1712, 1437  $\text{cm}^{-1}$ ;  $^1\text{H}$  NMR ( $\text{CDCl}_3$ ):  $\delta$  7.29 (d,  $J$  = 1.4 Hz, 1H), 6.25 (dd,  $J$  = 1.8 Hz, 3.2 Hz, 1H), 6.07 (d,  $J$  = 3.2 Hz, 1H), 3.76-3.71 (m, 1H), 3.64 (s, 3H), 2.76-2.69 (m, 4H);  $^{13}\text{C}$  NMR ( $\text{CDCl}_3$ ):  $\delta$  177.3, 171.9, 155.0, 141.6, 110.2, 105.5, 51.8, 37.7, 37.5, 31.6; HRMS (ESI-Orbitrap) calcd. for  $\text{C}_{10}\text{H}_{11}\text{O}_5$   $m/z$  211.0601  $[\text{M}-\text{H}]^-$ , found 211.0609;  $[\alpha]_{\text{D}}^{23}$  +1.7 ( $c$  0.73,  $\text{CHCl}_3$ , 89% ee); HPLC (Daicel CHIRALPAK AD-H,  $\phi$  0.46 cm  $\times$  25 cm, detection 220 nm,  $n$ -hexane /  $i$ PrOH = 19/1, flow rate = 1.0 mL/min)  $t_{\text{R}}$  = 18.7 min (major),  $t_{\text{R}}$  = 21.0 min (minor).

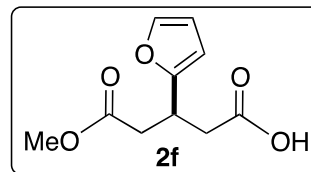**Racemic Sample**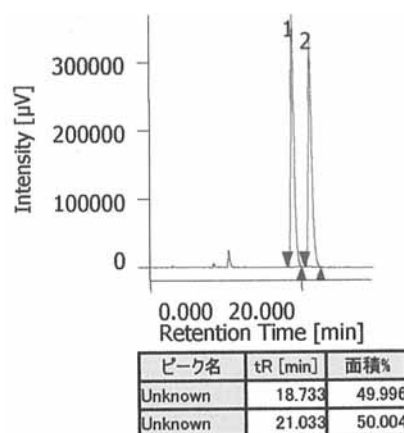**Chiral Sample**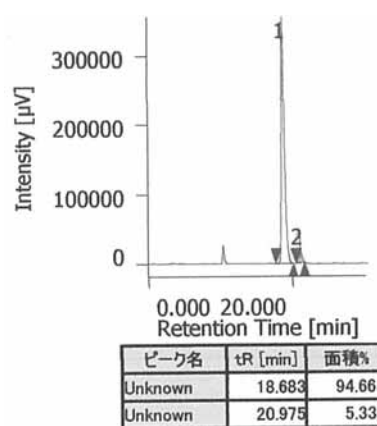**Methyl 3-trifluoromethylglutarate (2g)**

Colorless oil. Yield = 86%. IR (neat):  $\nu$  3203, 1743, 1720, 1440  $\text{cm}^{-1}$ ;  $^1\text{H}$  NMR ( $\text{CDCl}_3$ ):  $\delta$  3.72 (s, 3H), 3.33-3.25 (m, 1H), 2.78-2.69 (m, 2H), 2.63-2.51 (m, 2H);  $^{13}\text{C}$  NMR ( $\text{CDCl}_3$ ):  $\delta$  176.1, 170.7, 126.7 (d,  $J$  = 279.4 Hz), 52.2, 36.7 (q,  $J$  = 28.8 Hz), 32.6 (m); HRMS (ESI-Orbitrap) calcd. for  $\text{C}_7\text{H}_8\text{O}_4\text{F}_3$   $m/z$  213.0369  $[\text{M}-\text{H}]^-$ , found 213.0371;  $[\alpha]_{\text{D}}^{23}$  -2.0 ( $c$  0.27,  $\text{CHCl}_3$ , 75% ee); HPLC (Daicel CHIRALPAK AD-H,  $\phi$  0.46 cm  $\times$  25 cm, detection 220 nm,  $n$ -hexane /  $i$ PrOH = 19/1, flow rate = 1.0 mL/min)  $t_{\text{R}}$  = 9.3 min (major),  $t_{\text{R}}$  = 12.6 min (minor).

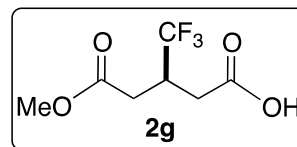**Racemic Sample**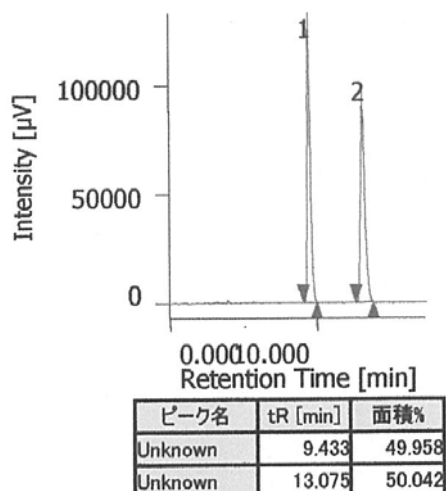**Chiral Sample**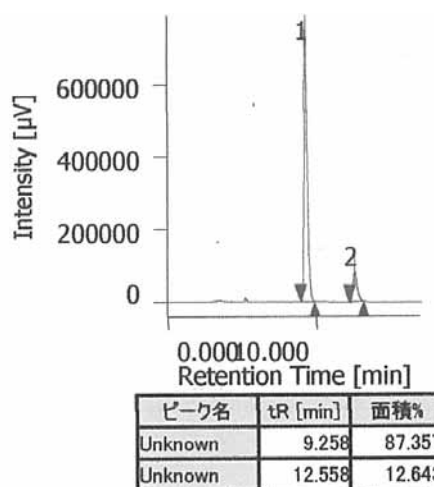

**Ethyl 3-methylglutarate (4a)**

Colorless oil. Yield = 88%. IR (neat):  $\nu$  3239, 1733, 1712, 1460  $\text{cm}^{-1}$ ;  $^1\text{H}$  NMR ( $\text{CDCl}_3$ ):  $\delta$  4.14 (q,  $J = 7.2$  Hz, 2H), 2.52-2.23 (m, 4H), 1.26 (t,  $J = 7.2$  Hz, 3H), 1.06 (d,  $J = 6.8$  Hz, 3H);  $^{13}\text{C}$  NMR ( $\text{CDCl}_3$ ):  $\delta$  178.1, 172.3, 60.4, 40.8, 40.5, 27.2, 19.8, 14.2; HRMS (ESI-Orbitrap) calcd. for  $\text{C}_8\text{H}_{13}\text{O}_4$   $m/z$  173.0808  $[\text{M}-\text{H}]^-$ , found 173.0822;  $[\alpha]_{\text{D}}^{23} -1.2$  ( $c$  0.49,  $\text{CHCl}_3$ , 90% ee); HPLC (Daicel CHIRALPAK AD-H,  $\phi$  0.46 cm  $\times$  25 cm, detection 220 nm,  $n$ -hexane /  $i$ PrOH = 19/1, flow rate = 1.0 mL/min)  $t_{\text{R}} = 8.9$  min (major),  $t_{\text{R}} = 10.7$  min (minor).

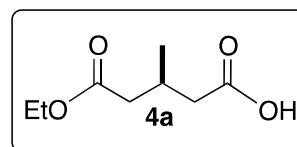**Racemic Sample**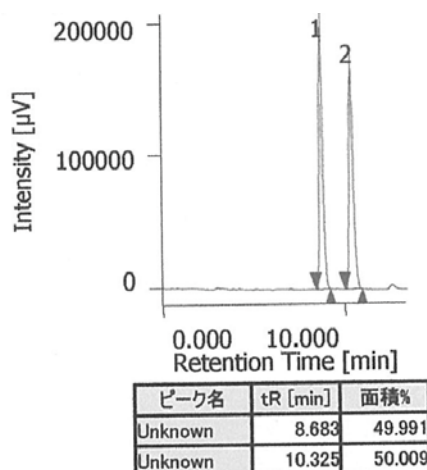**Chiral Sample**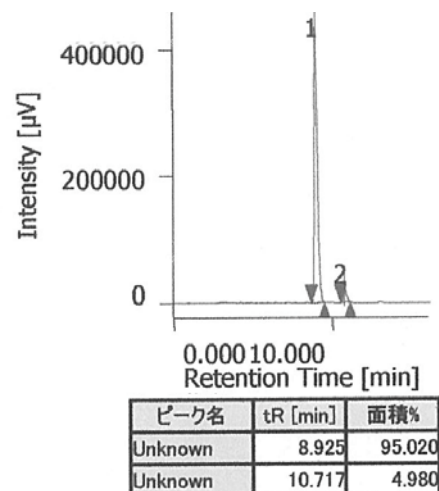**Propyl 3-methylglutarate (4b) is reported.<sup>9</sup>**

Yield = 90%; ee = 92%. HPLC (Daicel CHIRALPAK AD-H,  $\phi$  0.46 cm  $\times$  25 cm, detection 220 nm,  $n$ -hexane /  $i$ PrOH = 9/1, flow rate = 1.0 mL/min)  $t_{\text{R}} = 8.4$  min (major),  $t_{\text{R}} = 9.8$  min (minor).

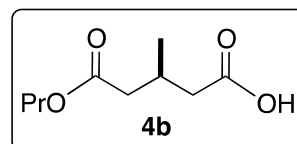**Racemic Sample**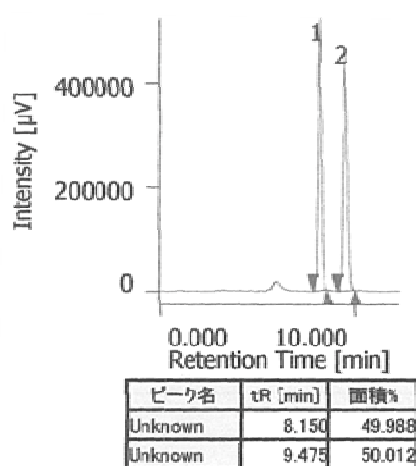**Chiral Sample**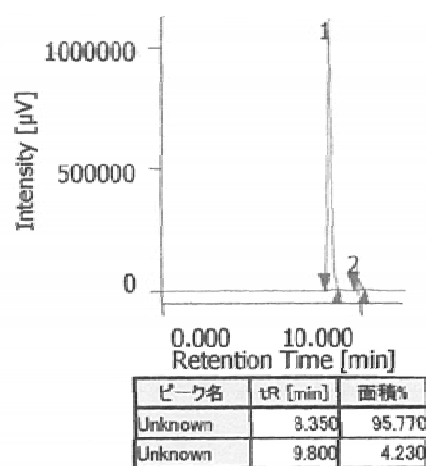

(9) Ito, H.; Inoue, T.; Iguchi, K. *Org. Lett.* **2008**, *10*, 3873.



**Benzyl 3-methylglutarate (4c)**

Colorless oil. Yield = 80%. IR (neat):  $\nu$  3034, 1734, 1708, 1455  $\text{cm}^{-1}$ ;  $^1\text{H}$  NMR ( $\text{CDCl}_3$ ):  $\delta$  7.39-7.29 (m, 5H), 5.12 (s, 2H), 2.56-2.41 (m, 2H), 2.38-2.25 (m, 2H), 1.04 (d,  $J = 6.4$  Hz, 3H);  $^{13}\text{C}$  NMR ( $\text{CDCl}_3$ ):  $\delta$  178.3, 172.1, 135.8, 128.5, 128.2, 66.3, 40.7, 40.4, 27.2, 19.8; HRMS (ESI-Orbitrap) calcd. for  $\text{C}_{13}\text{H}_{15}\text{O}_4$   $m/z$  235.0965.  $[\text{M}-\text{H}]^-$ , found 235.0972;  $[\alpha]_{\text{D}}^{23} +1.8$  ( $c$  0.40,  $\text{CHCl}_3$ , 91% ee); HPLC (Daicel CHIRALPAK AD-H,  $\phi$  0.46 cm  $\times$  25 cm, detection 220 nm,  $n$ -hexane /  $i$ PrOH = 19/1, flow rate = 1.0 mL/min)  $t_{\text{R}} = 12.6$  min (major),  $t_{\text{R}} = 14.7$  min (minor).

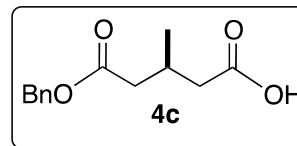**Racemic Sample**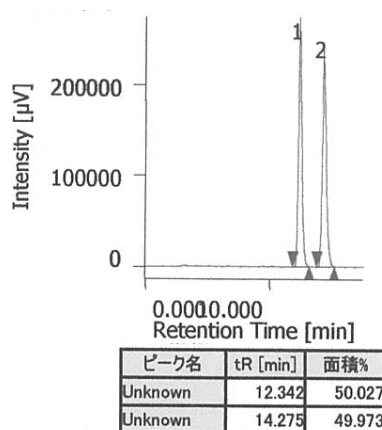**Chiral sample**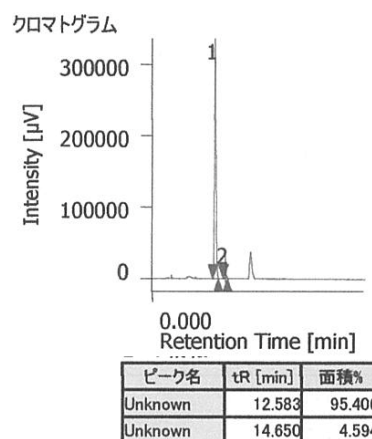**Allyl 3-methylglutarate (4d)**

Colorless oil. Yield = 88%. IR (neat):  $\nu$  3091, 1759, 1733, 1649, 1484  $\text{cm}^{-1}$ ;  $^1\text{H}$  NMR ( $\text{CDCl}_3$ ):  $\delta$  11.41 (br, 1H), 5.97-5.87 (m, 1H), 5.35-5.22 (m, 2H), 4.60-4.58 (m, 2H), 2.52-2.44 (m, 3H), 2.35-2.26 (m, 2H), 1.06 (d,  $J = 6.4$  Hz, 3H);  $^{13}\text{C}$  NMR ( $\text{CDCl}_3$ ):  $\delta$  178.7, 172.0, 132.0, 118.4, 65.1, 40.6, 27.1, 19.8; HRMS (ESI-Orbitrap) calcd. for  $\text{C}_9\text{H}_{13}\text{O}_4$   $m/z$  185.0808  $[\text{M}-\text{H}]^-$ , found 185.0813;  $[\alpha]_{\text{D}}^{23} +1.1$  ( $c$  0.85,  $\text{CHCl}_3$ , 90% ee); HPLC (Daicel CHIRALPAK AD-H,  $\phi$  0.46 cm  $\times$  25 cm, detection 220 nm,  $n$ -hexane /  $i$ PrOH = 19/1, flow rate = 1.0 mL/min)  $t_{\text{R}} = 9.0$  min (major),  $t_{\text{R}} = 10.5$  min (minor).

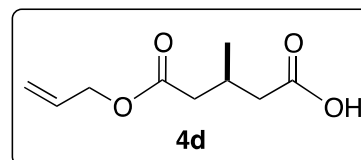**Racemic Sample**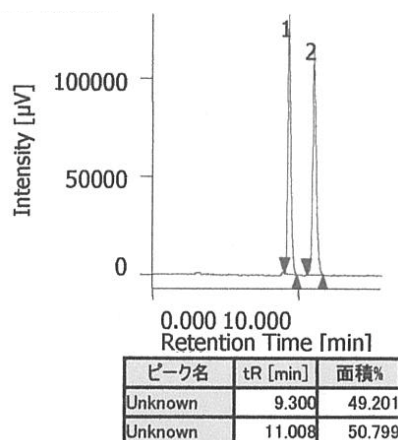**Chiral Sample**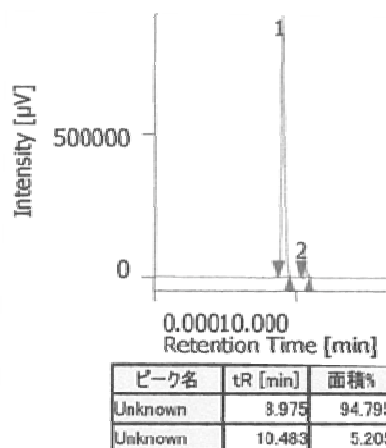

**Propargyl 3-methylglutarate (4e)**

Colorless oil. Yield = 98%. IR (neat):  $\nu$  3292, 2967, 1739, 1709  $\text{cm}^{-1}$ ;  $^1\text{H}$  NMR ( $\text{CDCl}_3$ ):  $\delta$  4.66-4.62 (m, 2H), 2.49-2.41 (m, 4H), 2.32-2.27 (m, 2H), 1.04 (d,  $J = 3.6$  Hz, 3H);  $^{13}\text{C}$  NMR ( $\text{CDCl}_3$ ):  $\delta$  178.4, 171.4, 77.5, 74.9, 51.9, 40.32, 40.28, 27.1, 19.8; HRMS (ESI-Orbitrap) calcd. for  $\text{C}_9\text{H}_{11}\text{O}_4$   $m/z$  183.0652  $[\text{M}-\text{H}]^-$ , found 183.0656;  $[\alpha]_{\text{D}}^{23} +2.4$  ( $c$  0.69,  $\text{CHCl}_3$ , 91% ee); HPLC (Daicel CHIRALPAK AD-H,  $\phi$  0.46 cm  $\times$  25 cm, detection 220 nm,  $n$ -hexane /  $i$ PrOH = 19/1, flow rate = 1.0 mL/min)  $t_{\text{R}} = 14.1$  min (major),  $t_{\text{R}} = 16.3$  min (minor).

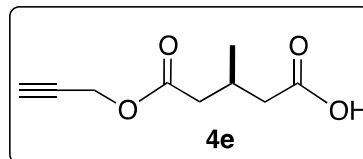**Racemic Sample**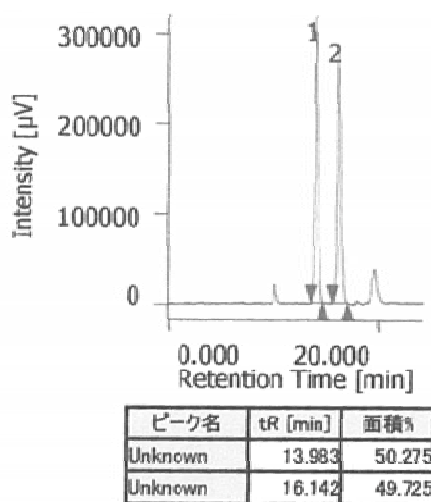**Chiral Sample**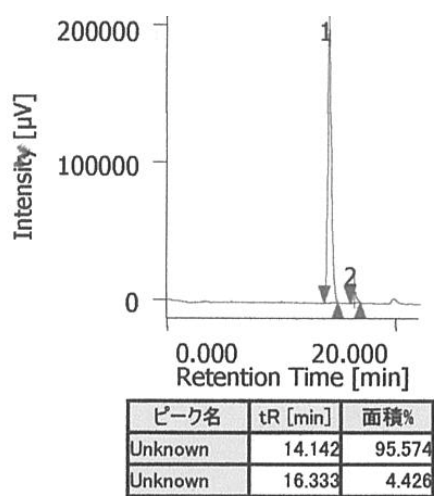

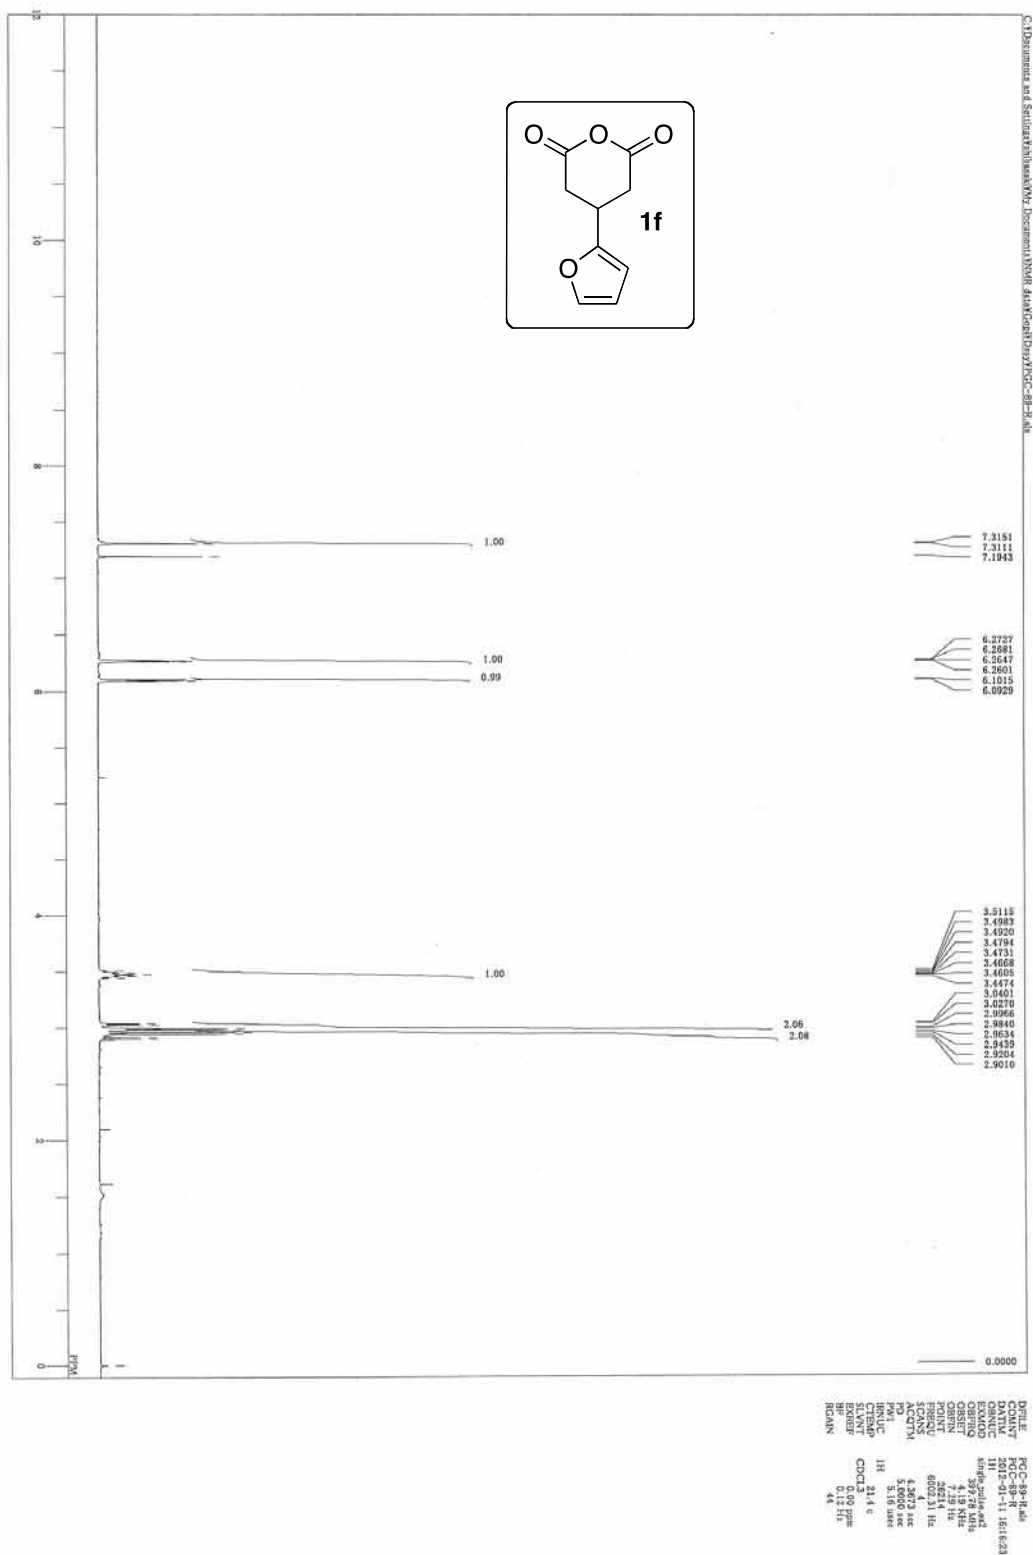



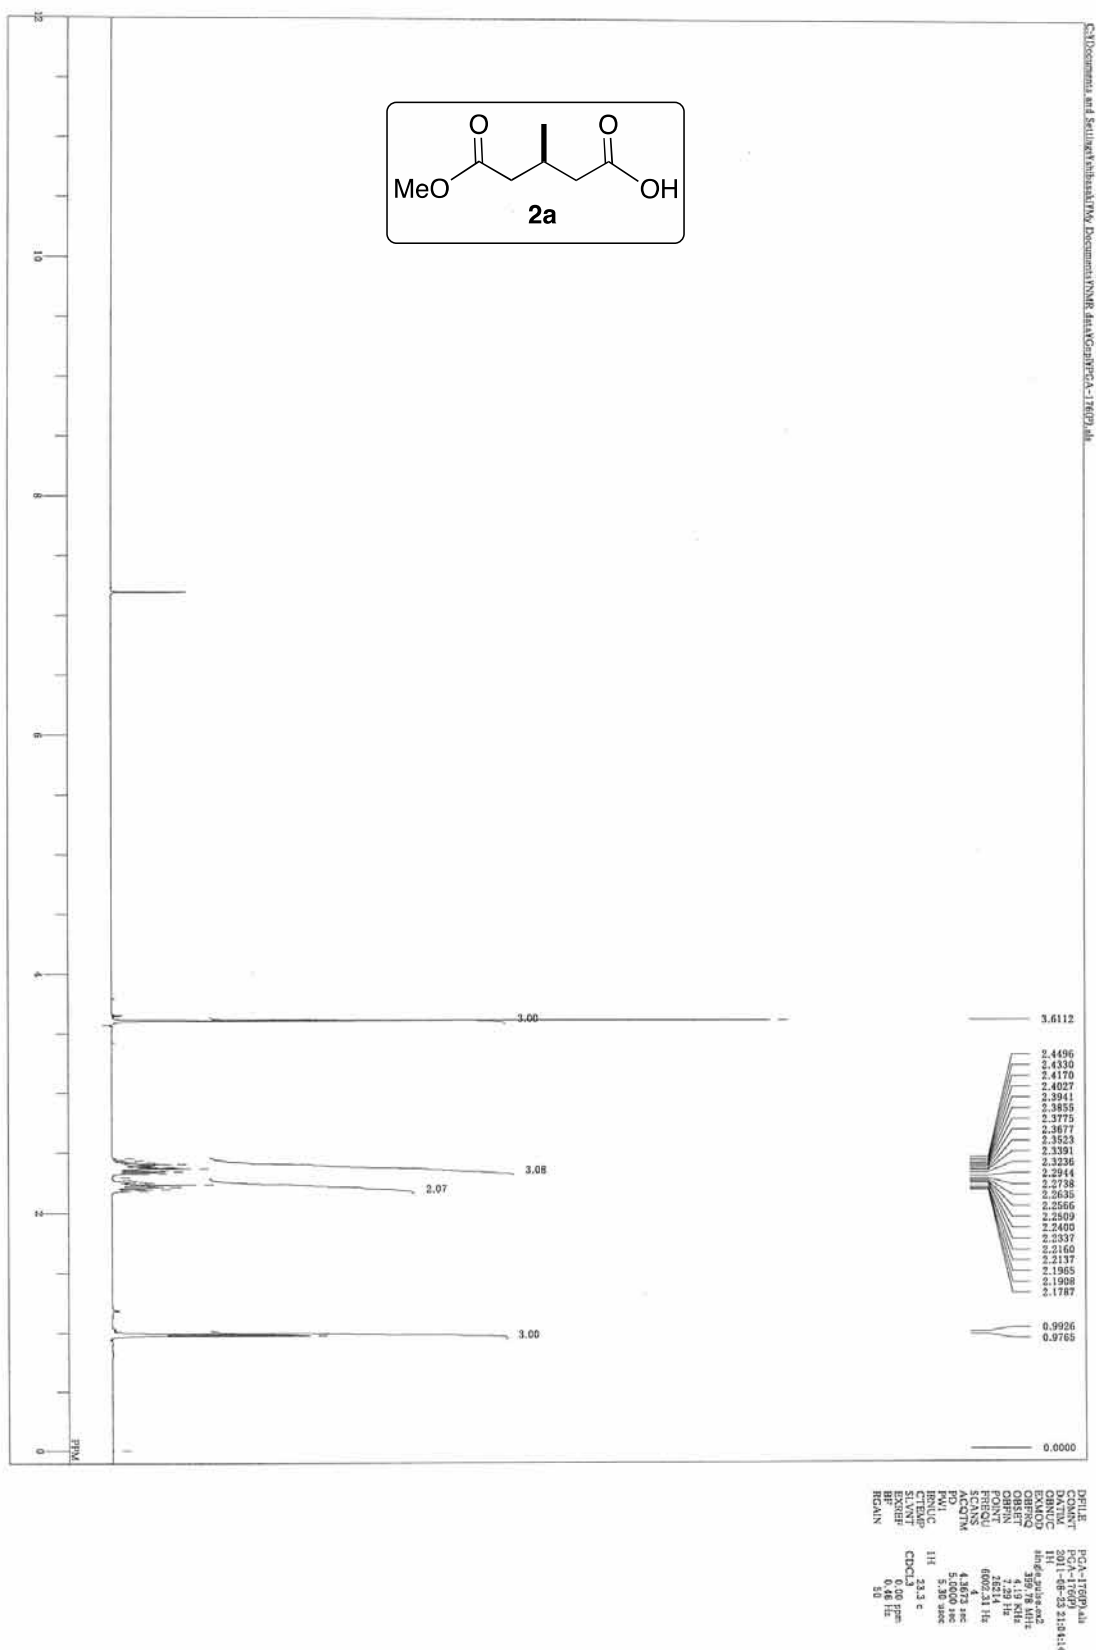

178.6100  
 172.7844

77.3146  
 77.0000  
 76.6854

51.6094

48.5112  
 48.4635

27.1818

19.8497

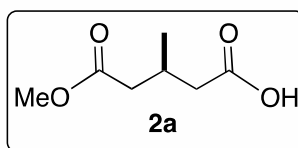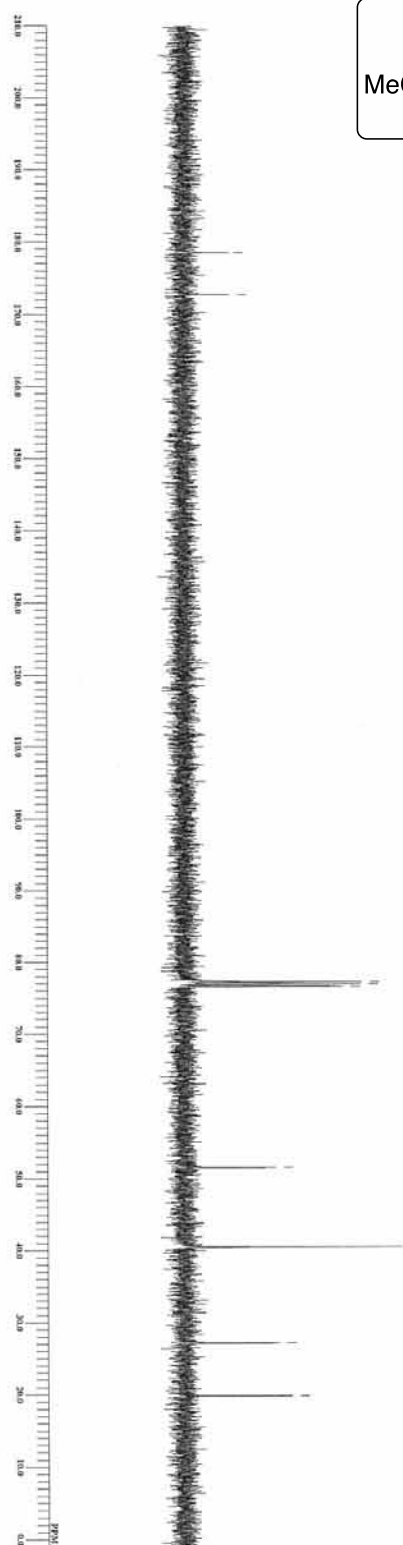

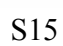

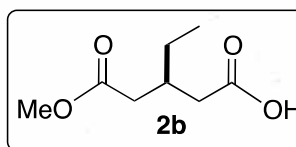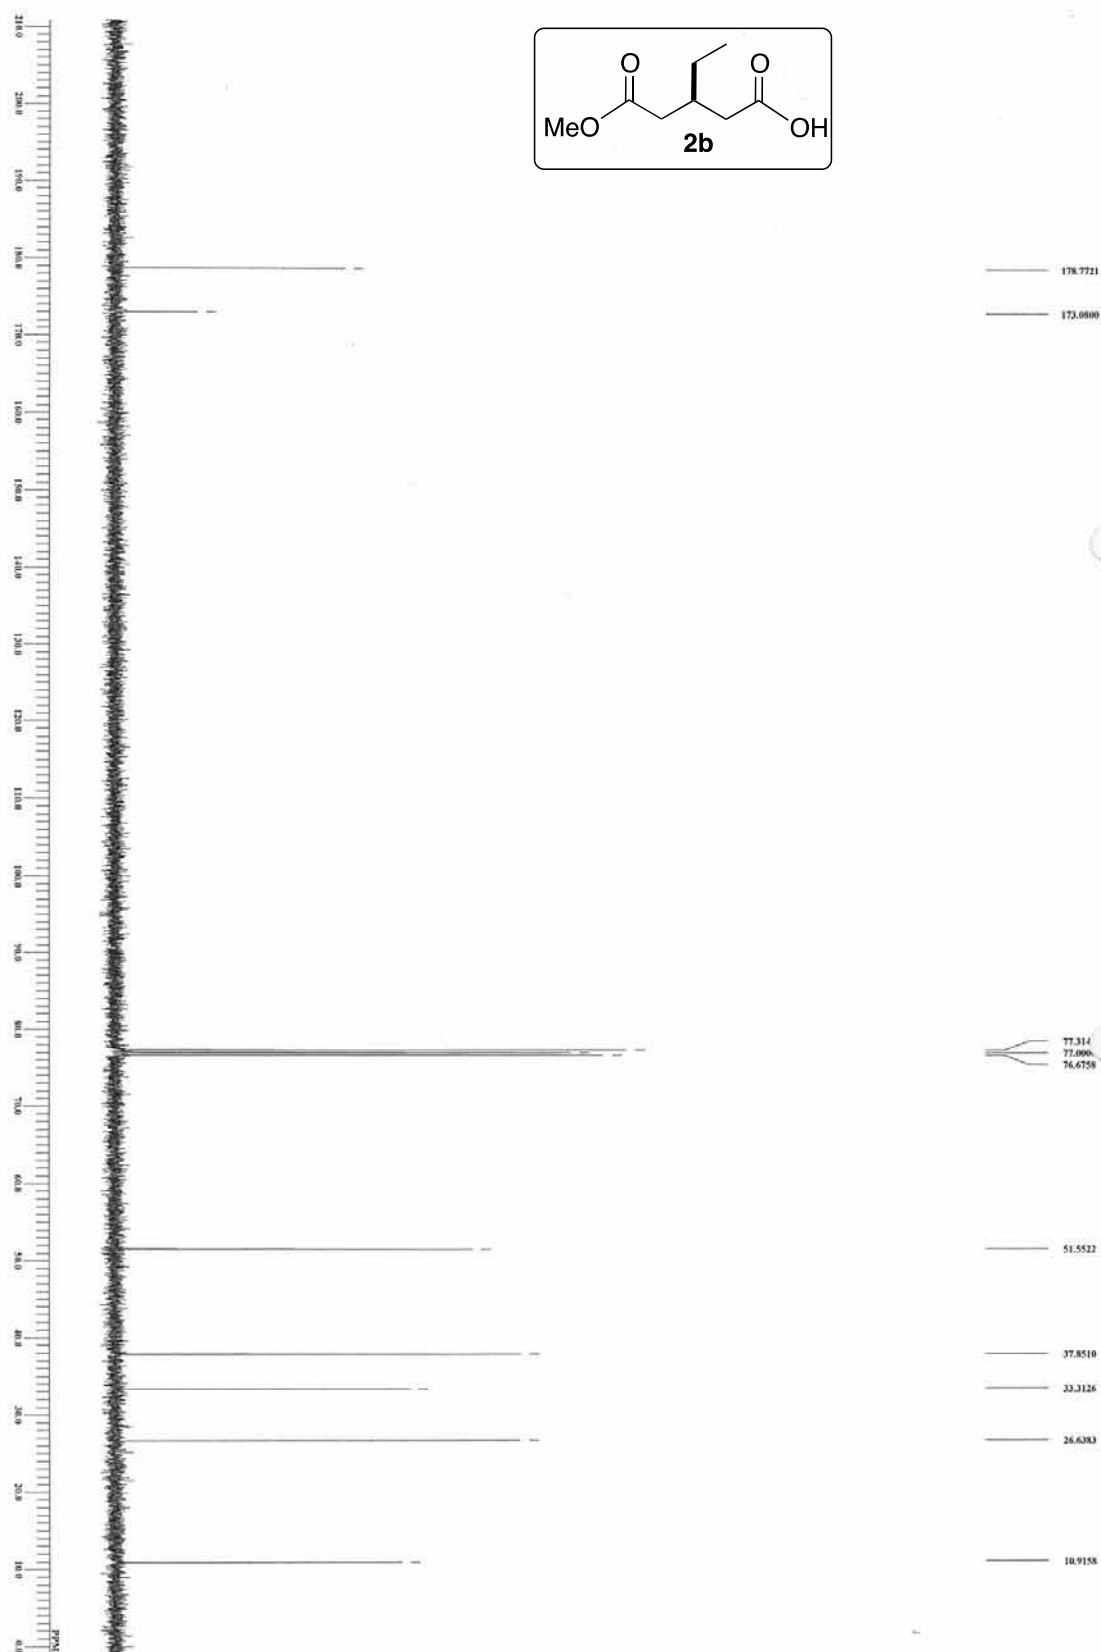





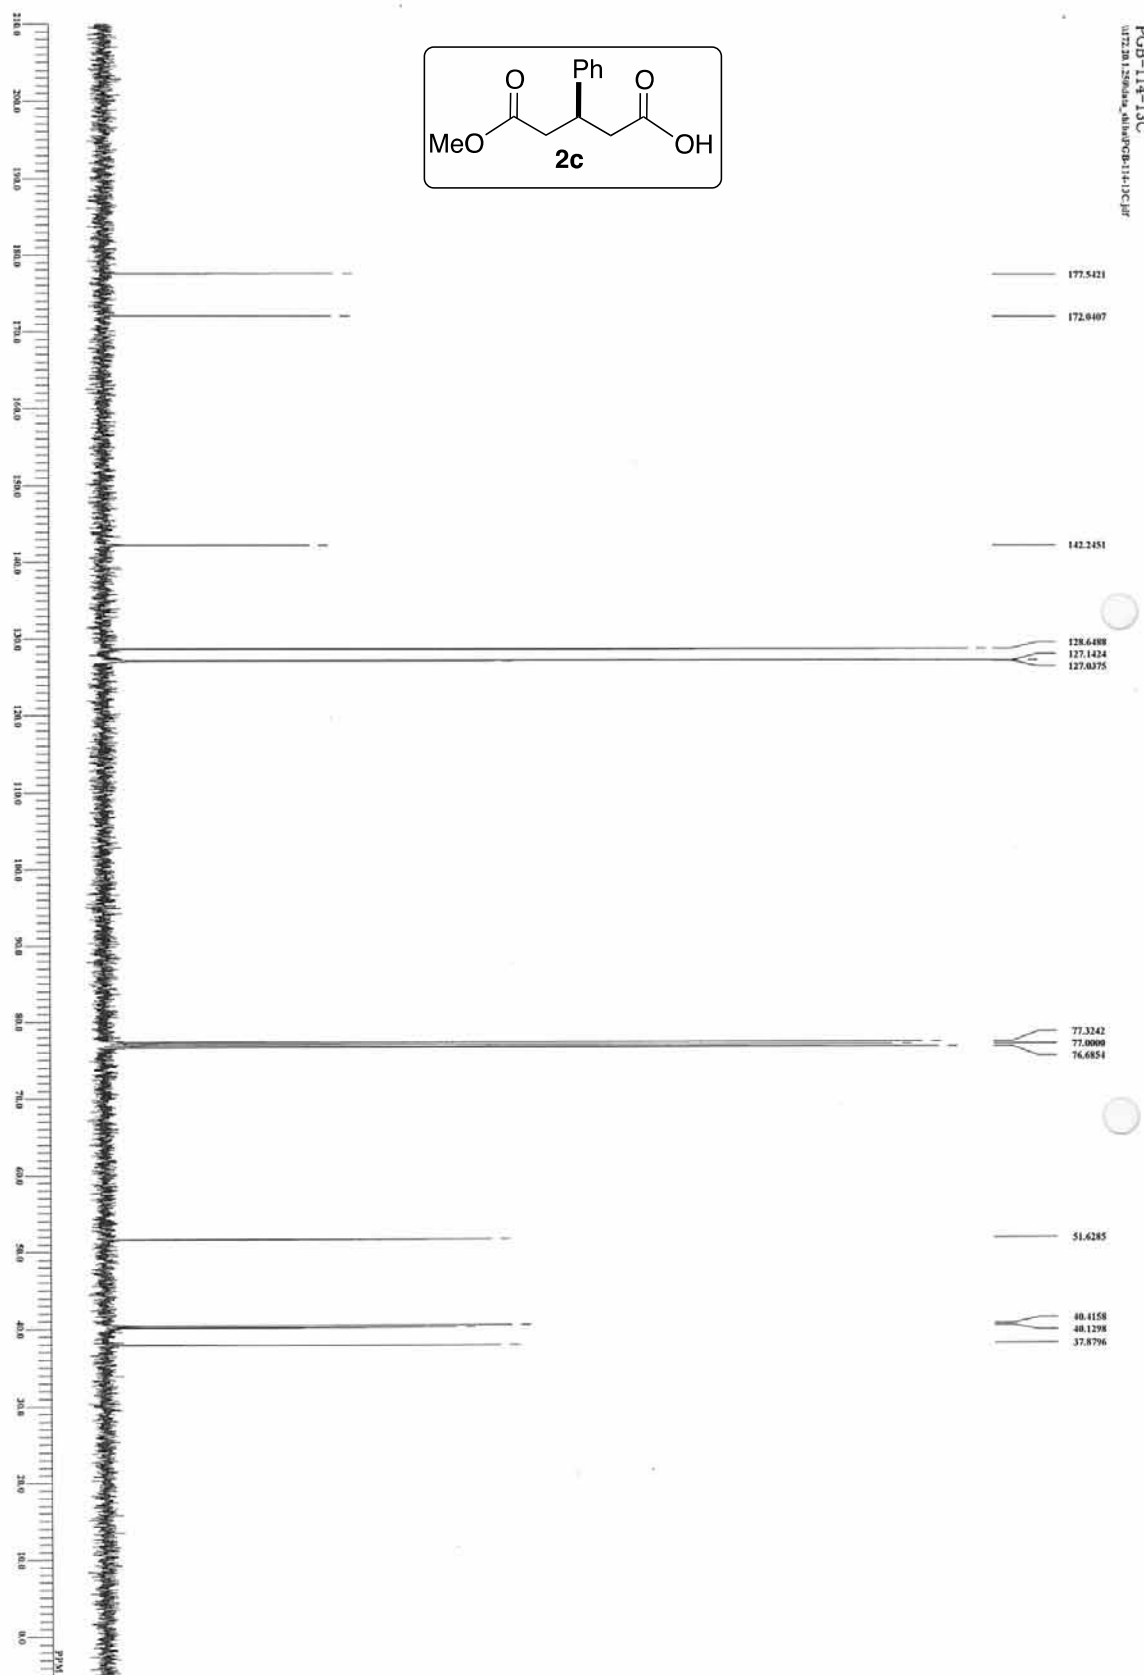



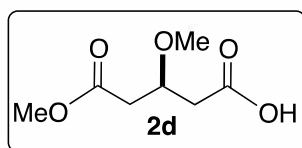

176.3583  
171.3161

77.3242  
77.0000  
76.6854  
73.9871

57.4922  
51.8382

38.7473  
38.6328

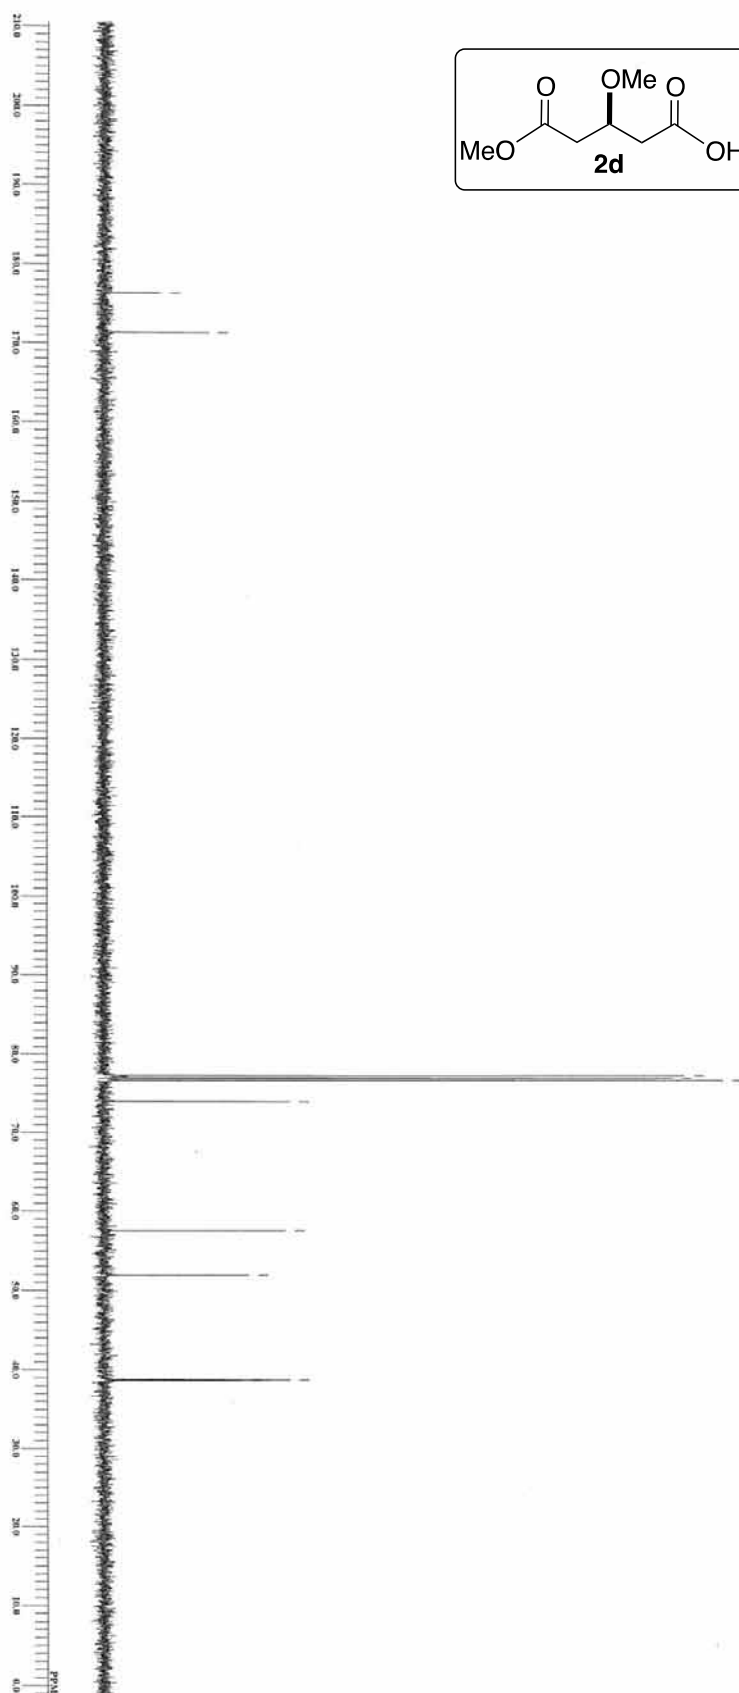

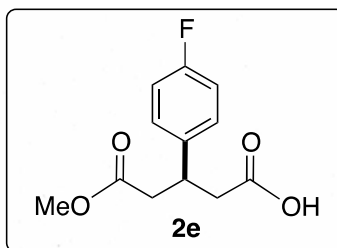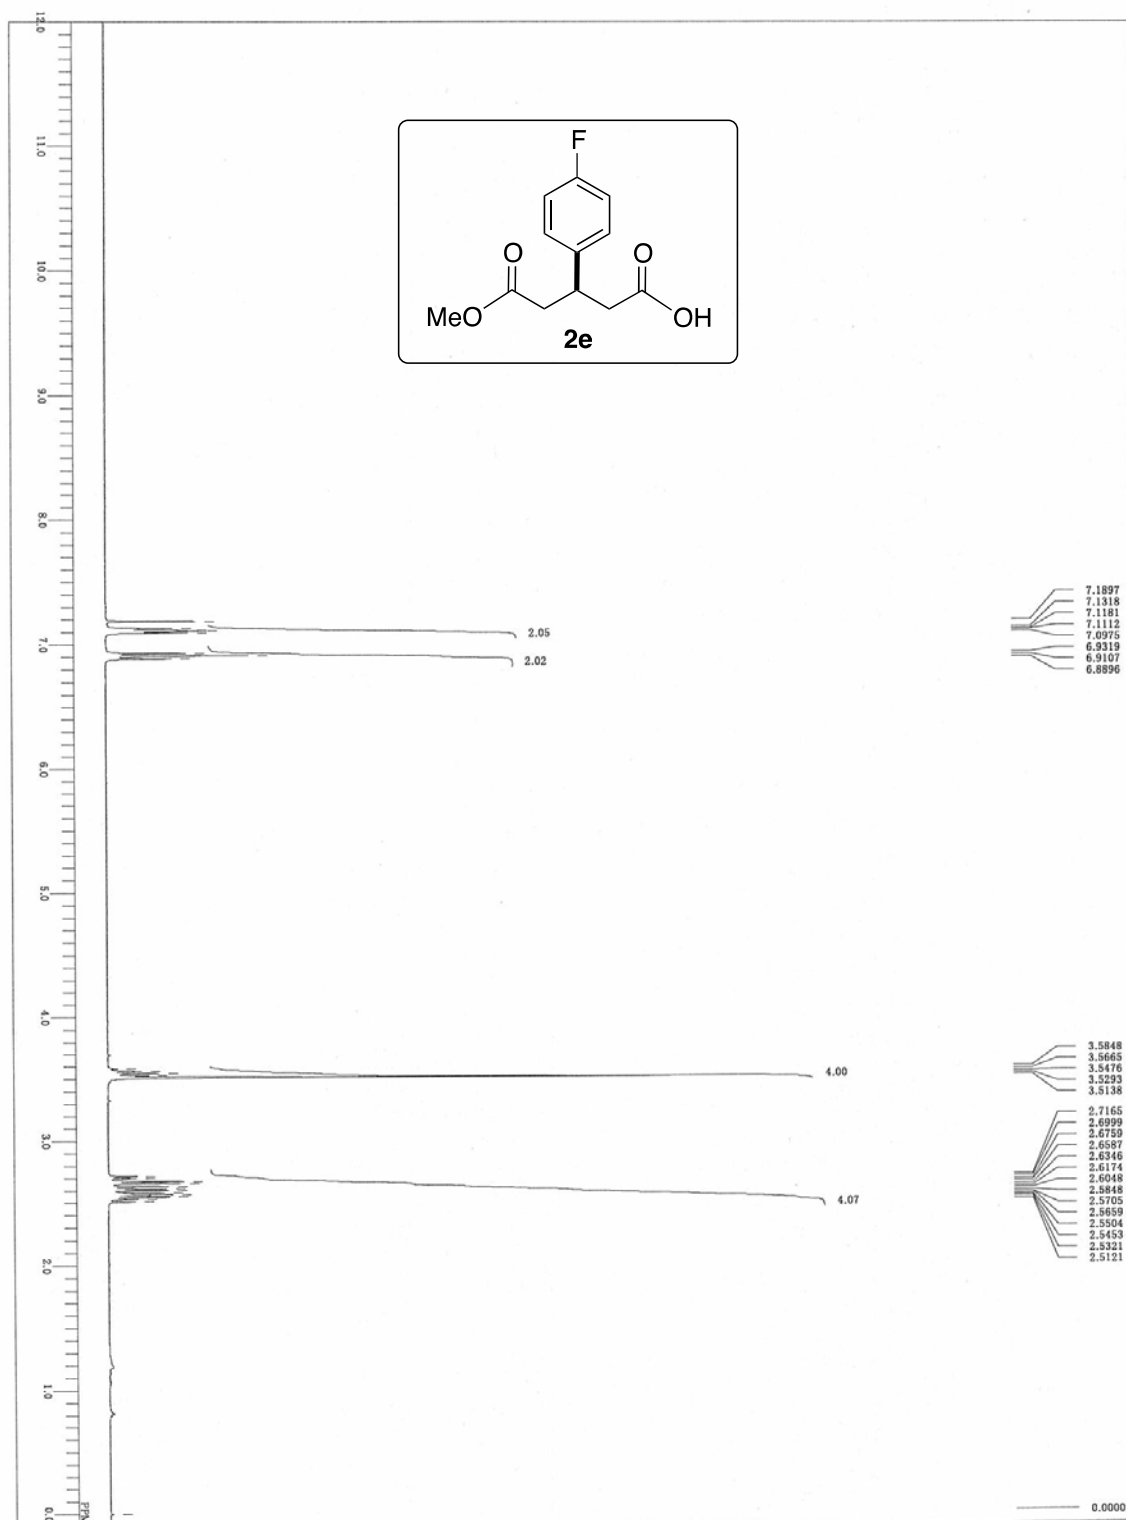

DNAME POC-84-P1.fid  
 DATE\_ 10/12/2012  
 TIME\_ 11:55:13  
 INSTR\_ spect  
 P1\_ 4.19 MHz  
 P2\_ 201.1 MHz  
 P3\_ 600.13 MHz  
 P4\_ 5.16 sec  
 P5\_ 21.2 sec  
 P6\_ 0.09 Hz  
 P7\_ 0.09 Hz  
 P8\_ 44  
 P9\_ 44  
 P10\_ 44

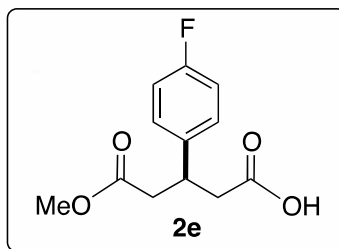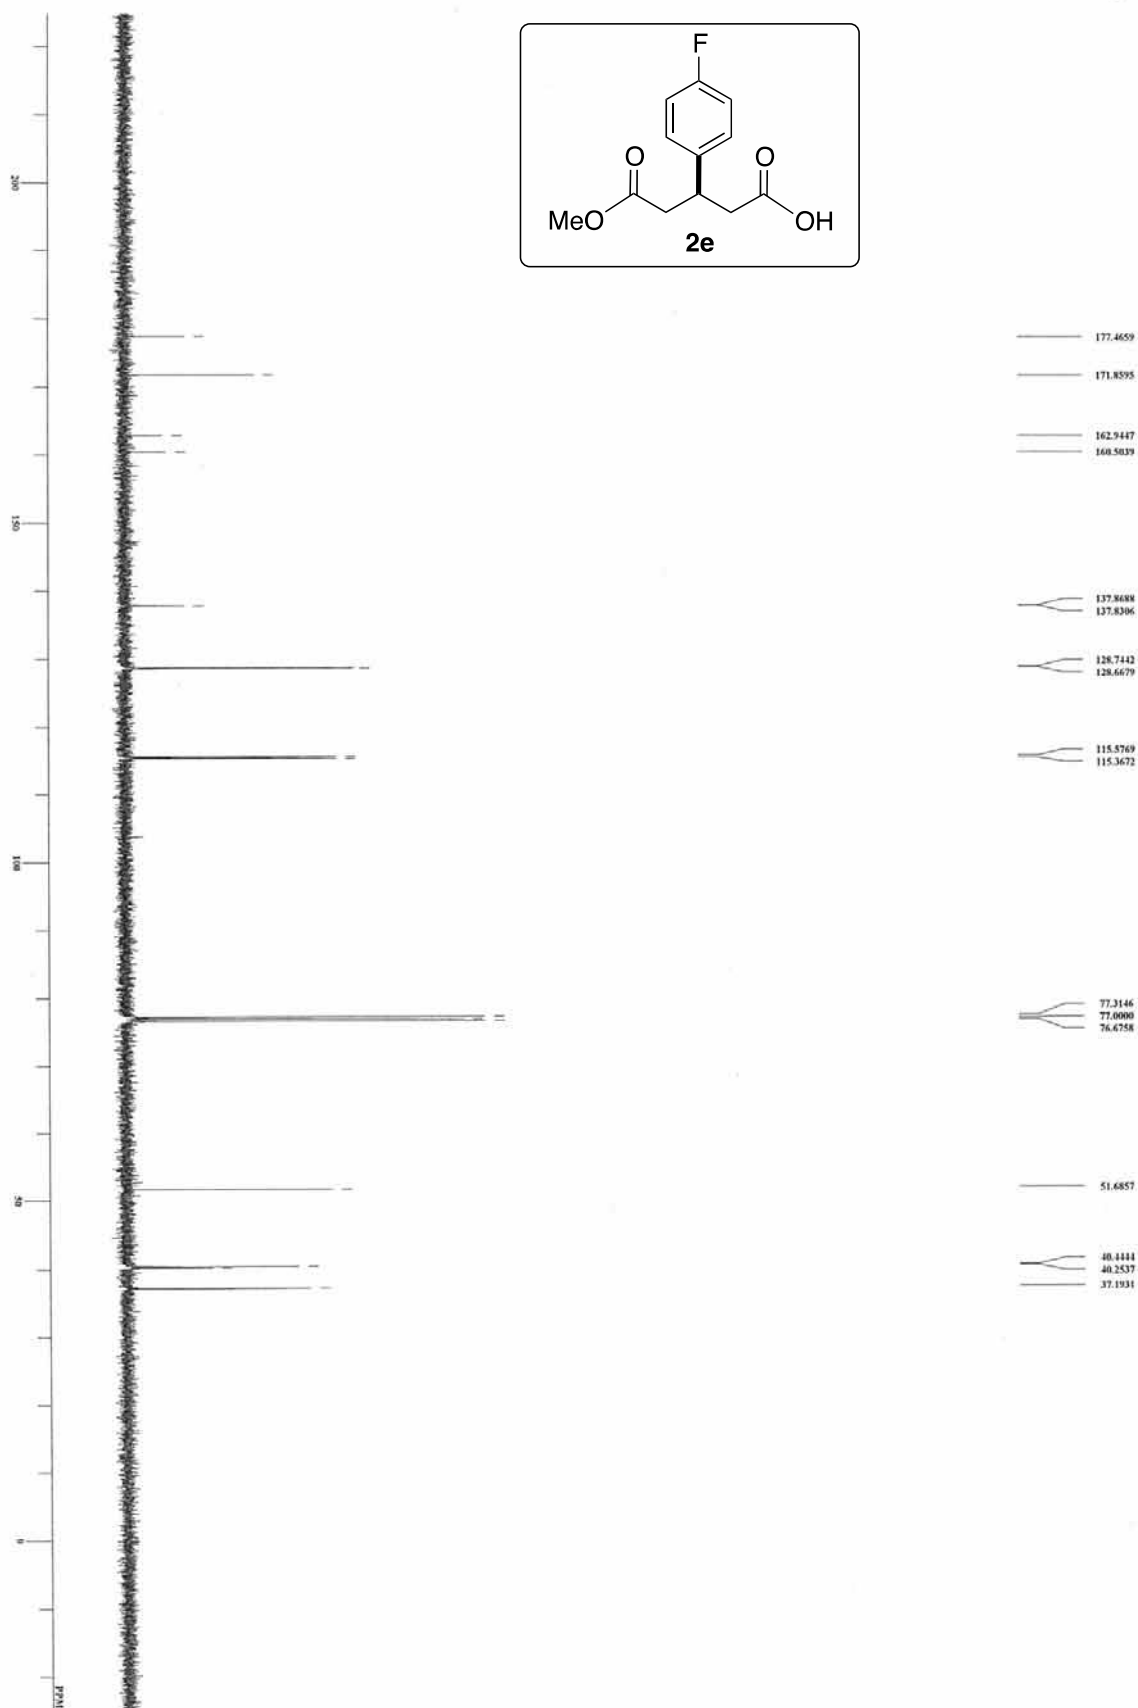

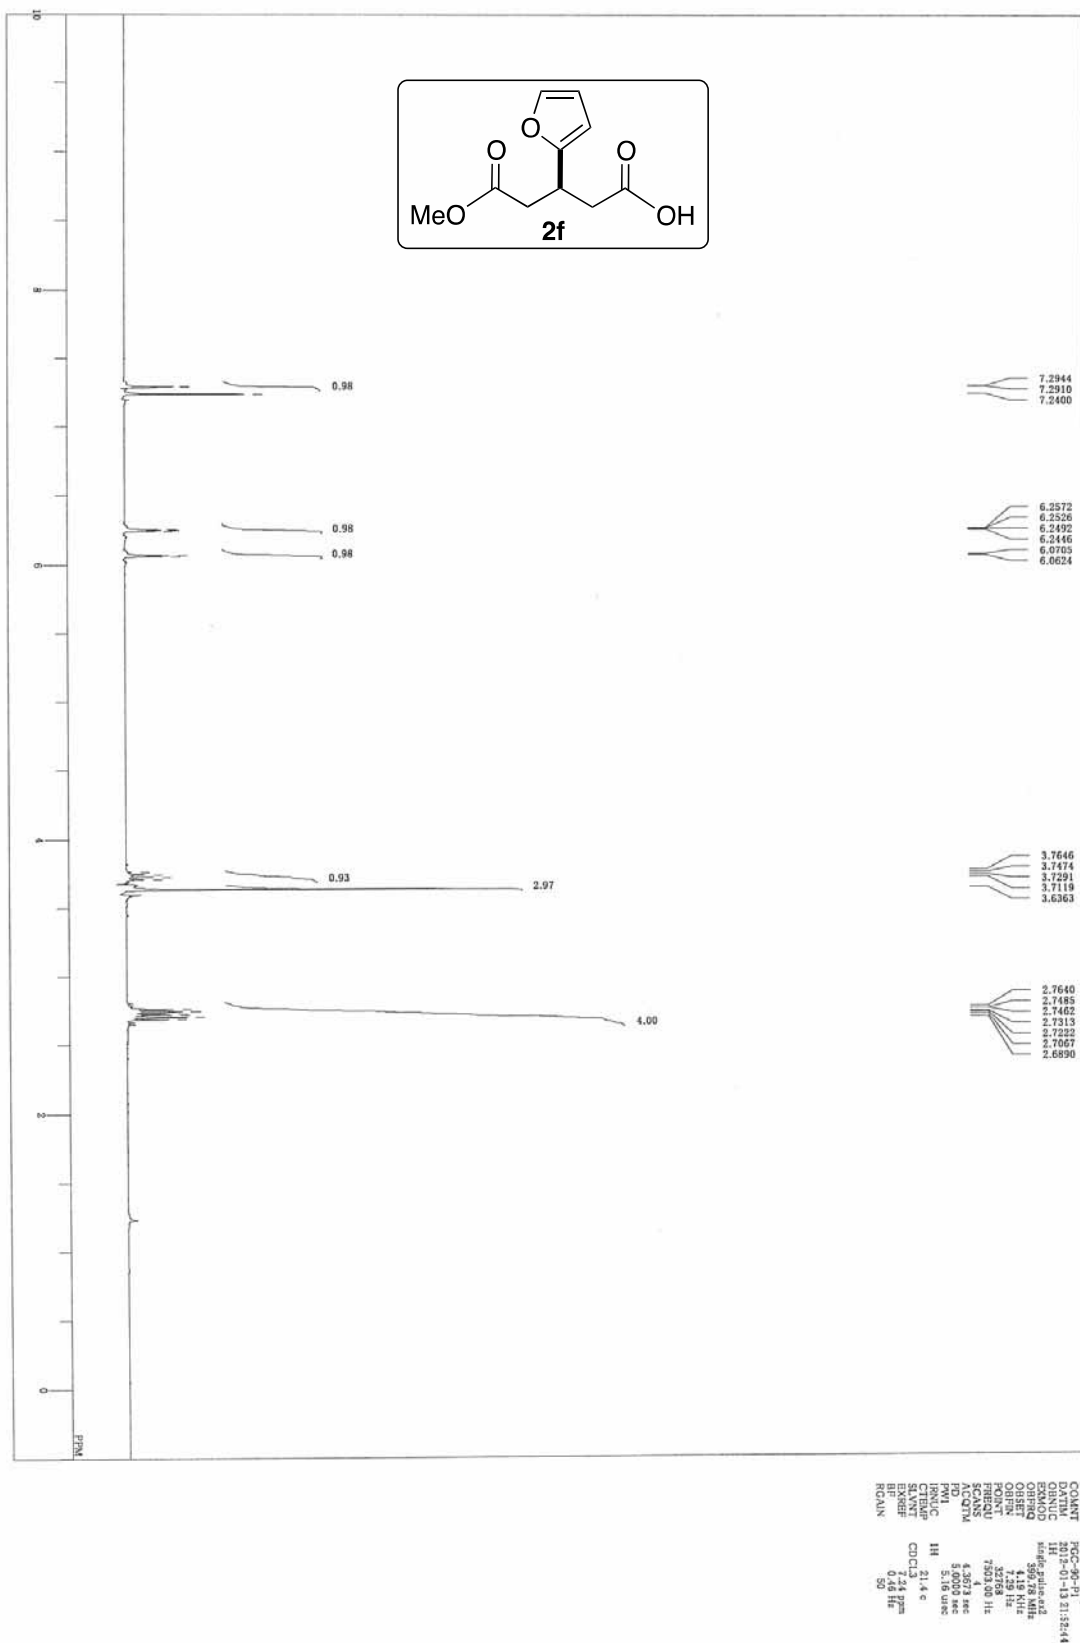

PGC-90-13C  
M7230.1207010\_ahhwtCC-90-13C.j8f

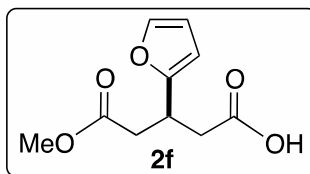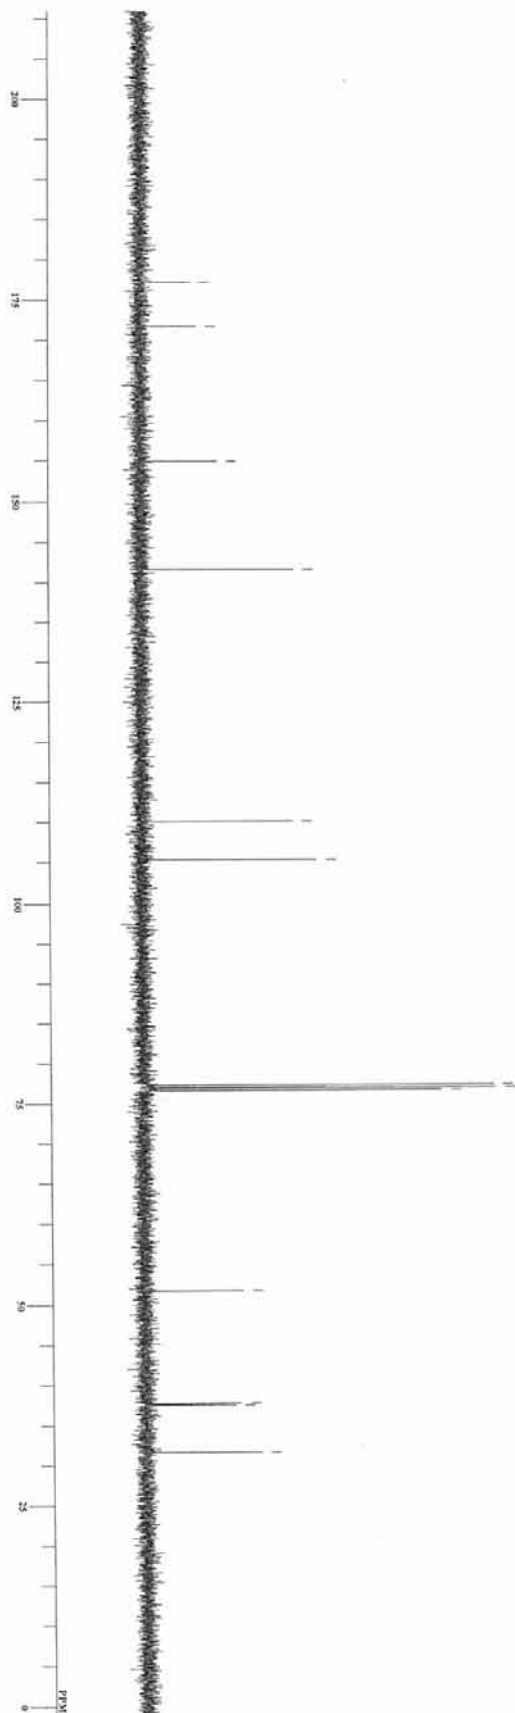

|          |
|----------|
| 177.2847 |
| 171.8500 |
| 155.0215 |
| 141.6349 |
| 110.1517 |
| 105.4607 |
| 77.3146  |
| 77.0000  |
| 76.6758  |
| 51.7810  |
| 37.6985  |
| 37.5078  |
| 31.6154  |





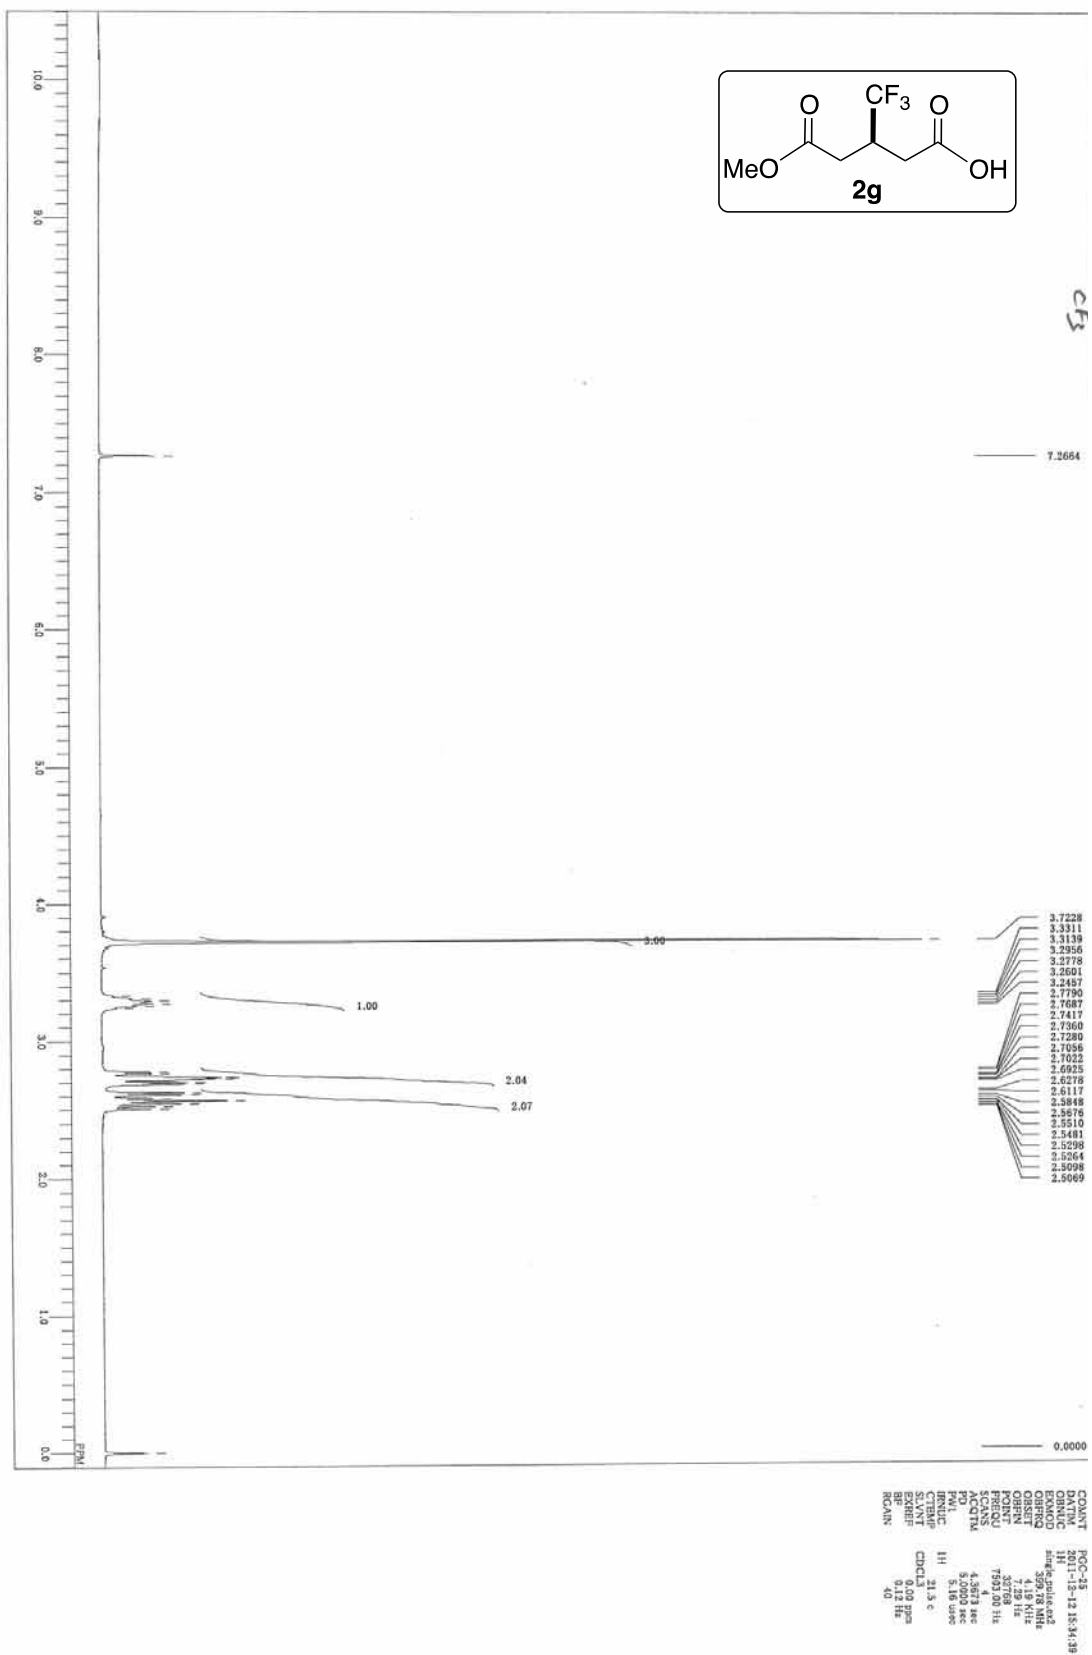

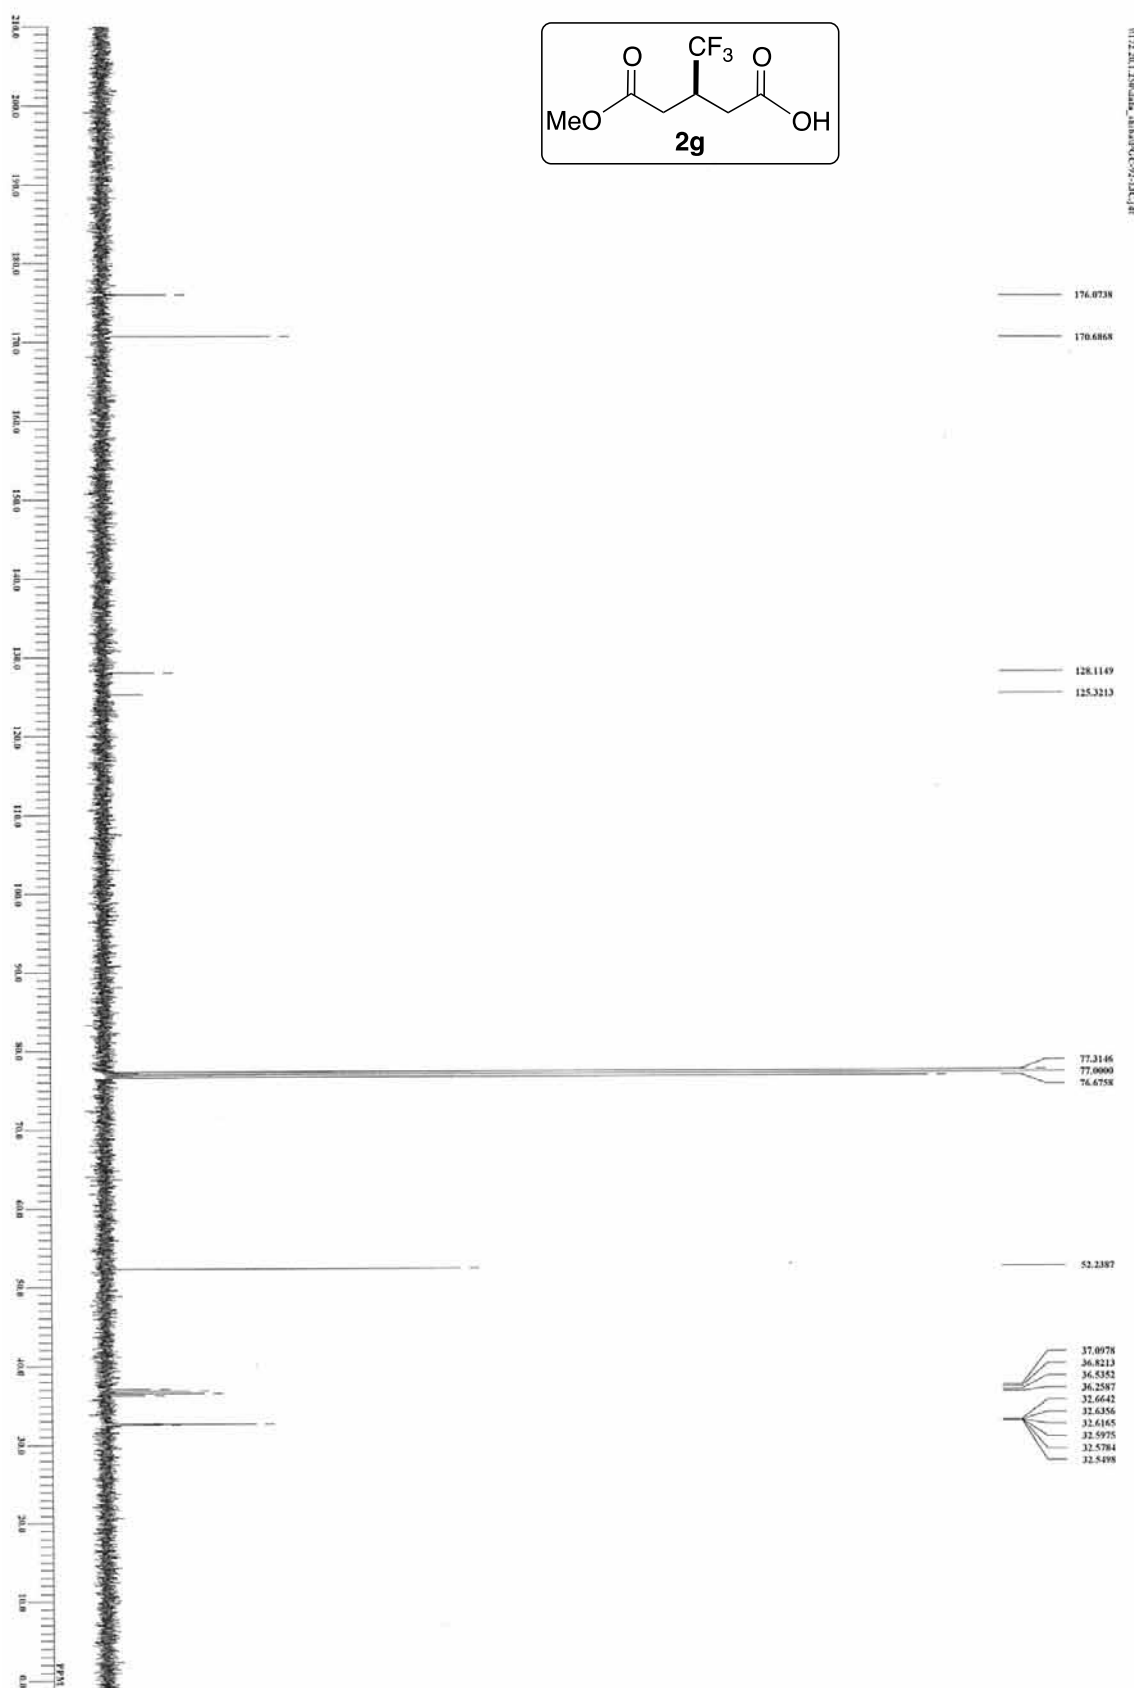

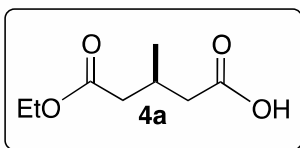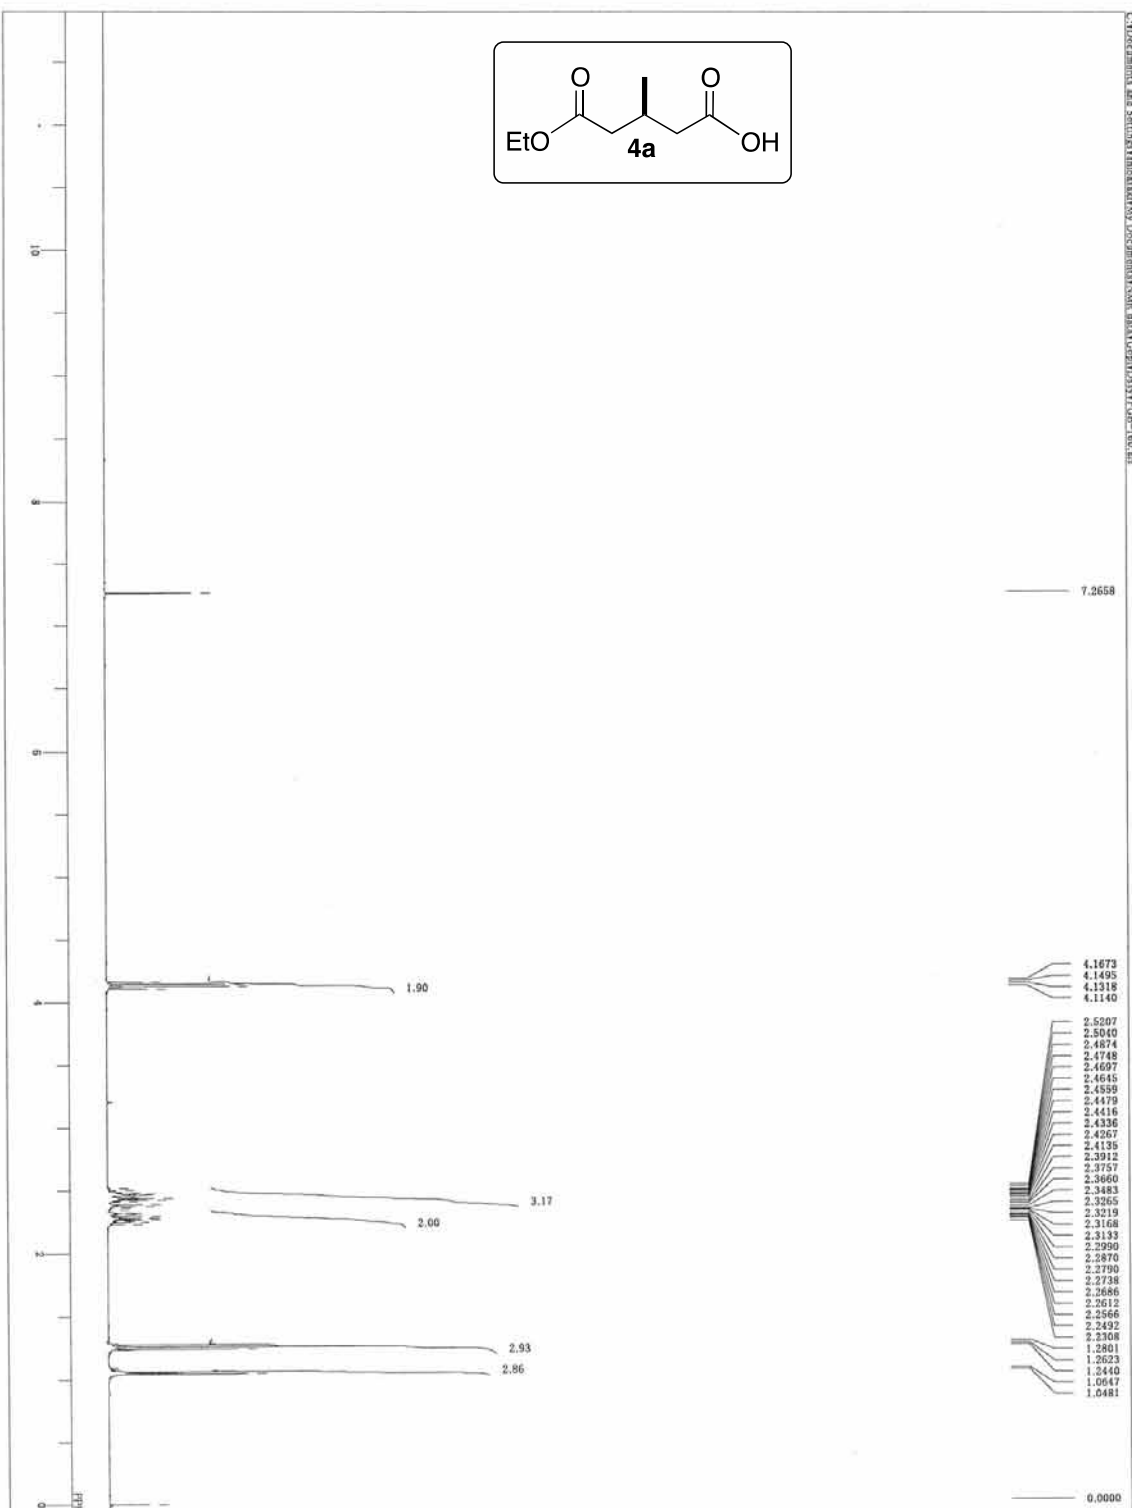

NAME: 4a  
 SMILES: CCOC(=O)C[C@H](C)CC(=O)O  
 MW: 188.17  
 CAS: 100-10-1  
 Formula: C<sub>10</sub>H<sub>14</sub>O<sub>4</sub>  
 Density: 1.11 g/mL  
 Boiling Point: 170-175 °C  
 Melting Point: 10-15 °C  
 Refractive Index: 1.42  
 LogP: 0.5  
 Solubility: Soluble in water, ethanol, and other polar solvents.  
 Stability: Stable under normal conditions.  
 Hazards: Irritant.  
 Precautions: Avoid contact with eyes and skin.  
 First Aid: Flush with water.  
 PPE: Safety glasses, gloves.  
 Storage: Store in a cool, dry place.  
 Disposal: Dispose of in accordance with local regulations.

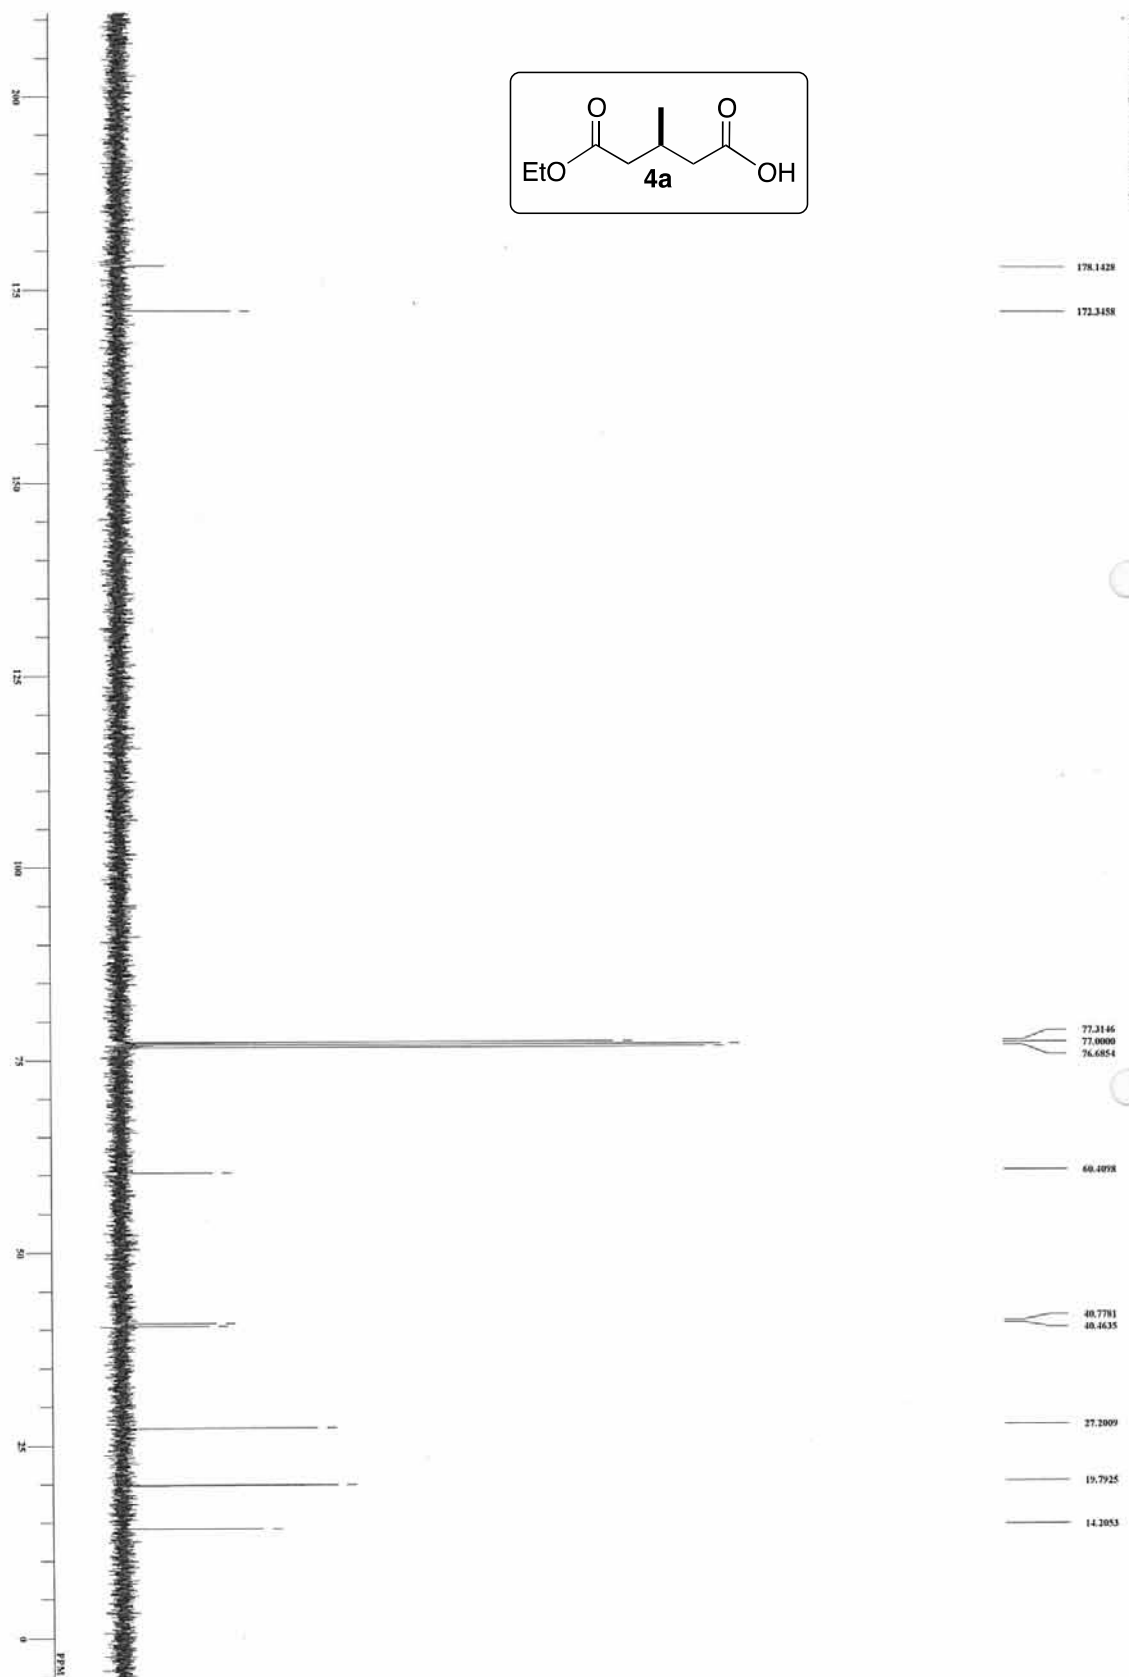



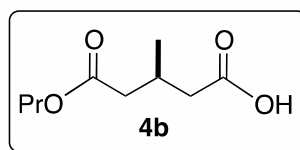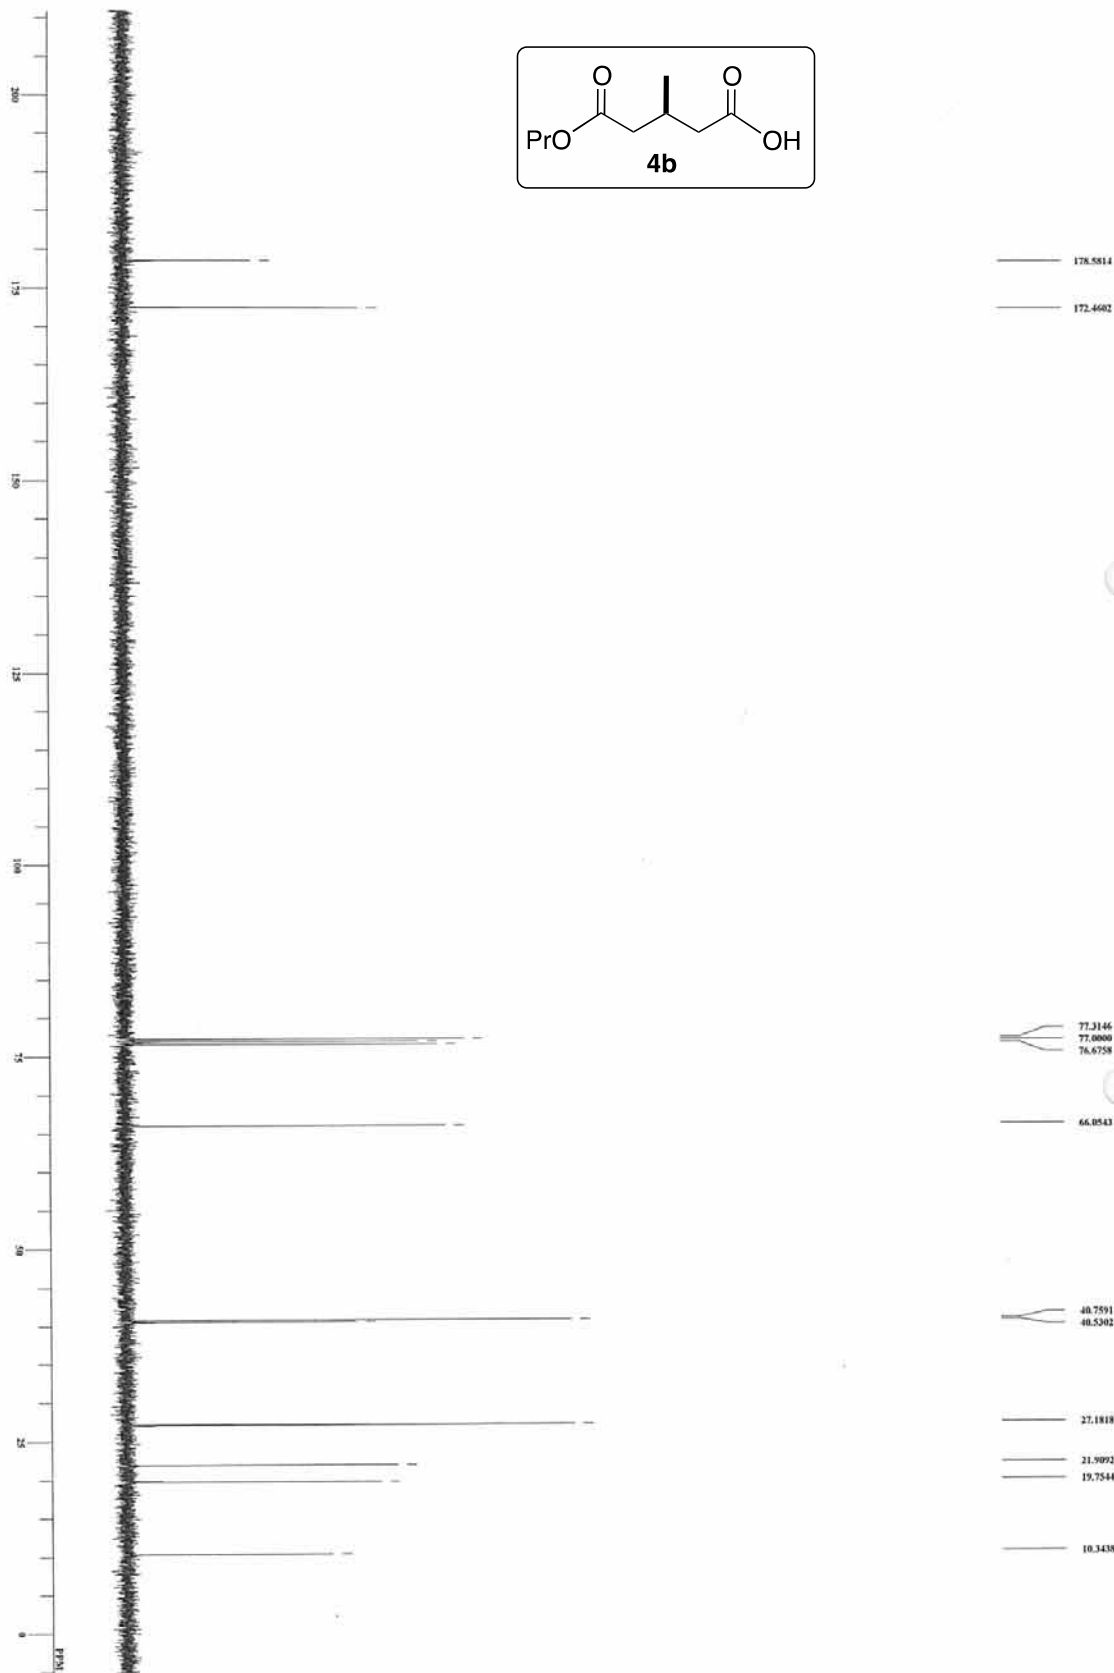

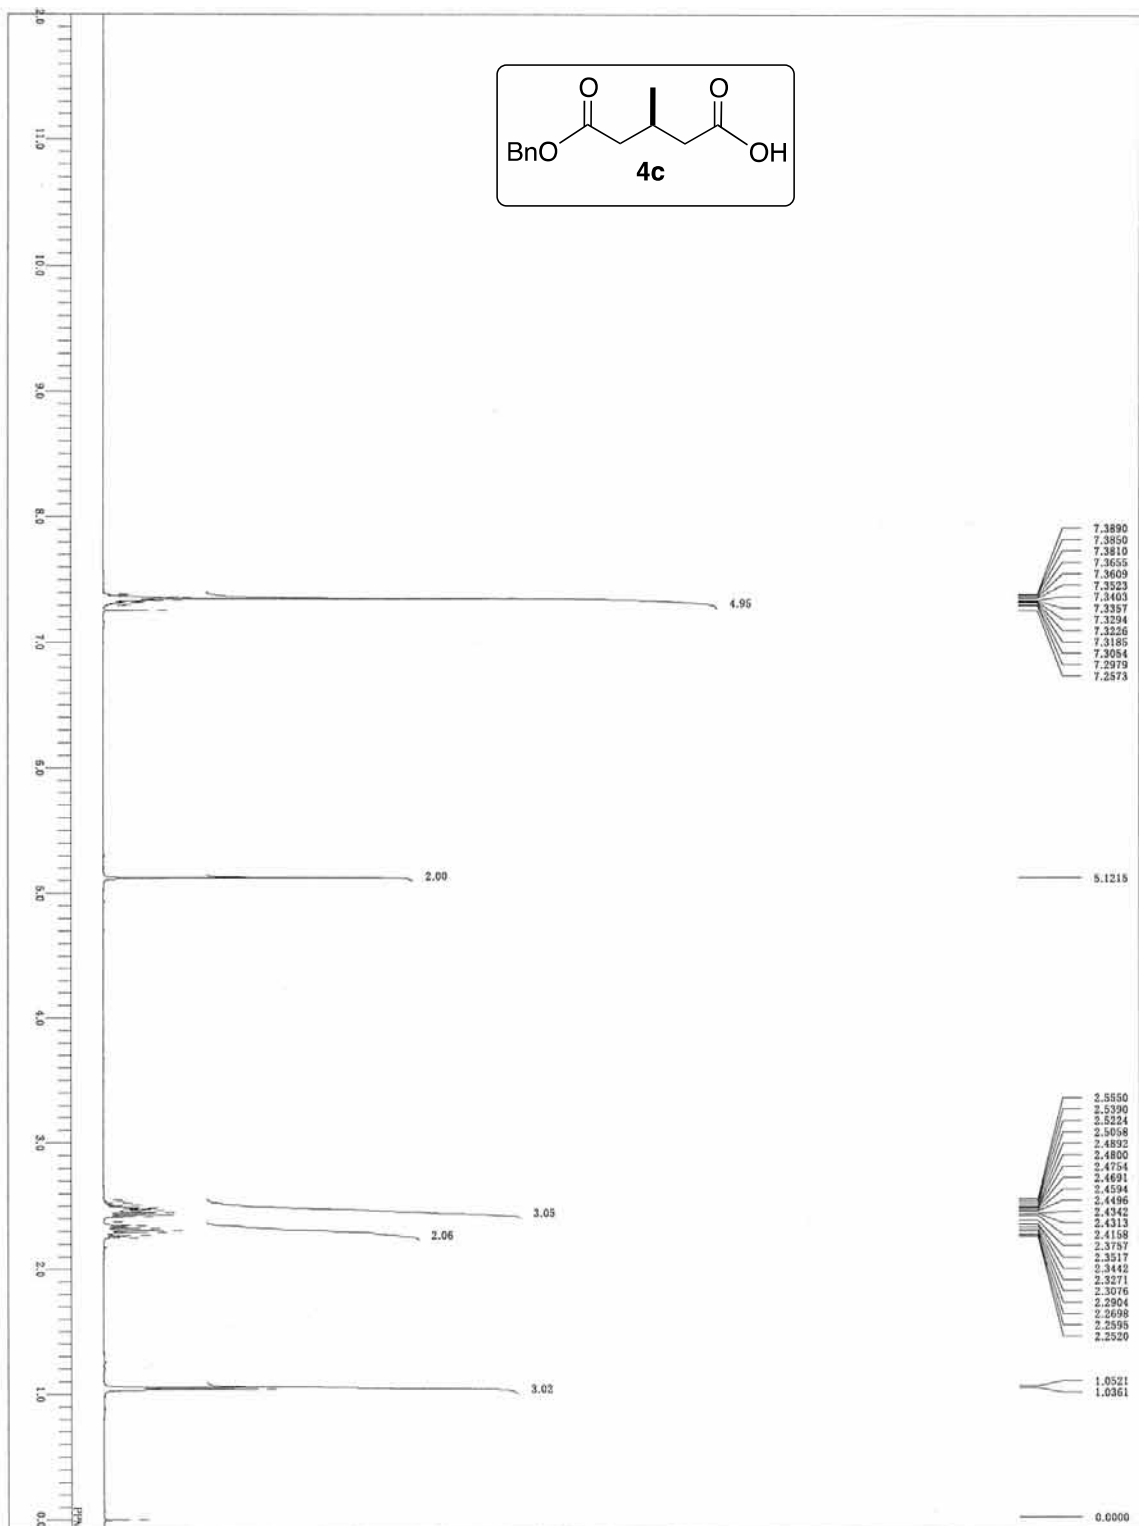

FILE PCB-127-F-4M  
 NAME YINHUAKUN  
 DATE 2011-10-26 17:39:36  
 INSTR 400MHz  
 P1 1.00  
 ORBIN 7.13 Hz  
 ORSET 7.13 Hz  
 FREQ 600.231 Hz  
 SCANS 4  
 ACQTIME 4.3678 sec  
 F2 50.00 MHz  
 PULP 5.30 usec  
 INVERT OFF  
 BRNDC 31.6 °C  
 SOLVENT CDCl3  
 EXREF 0.00 ppm  
 NS 1.00 Hz  
 NSCAN 36



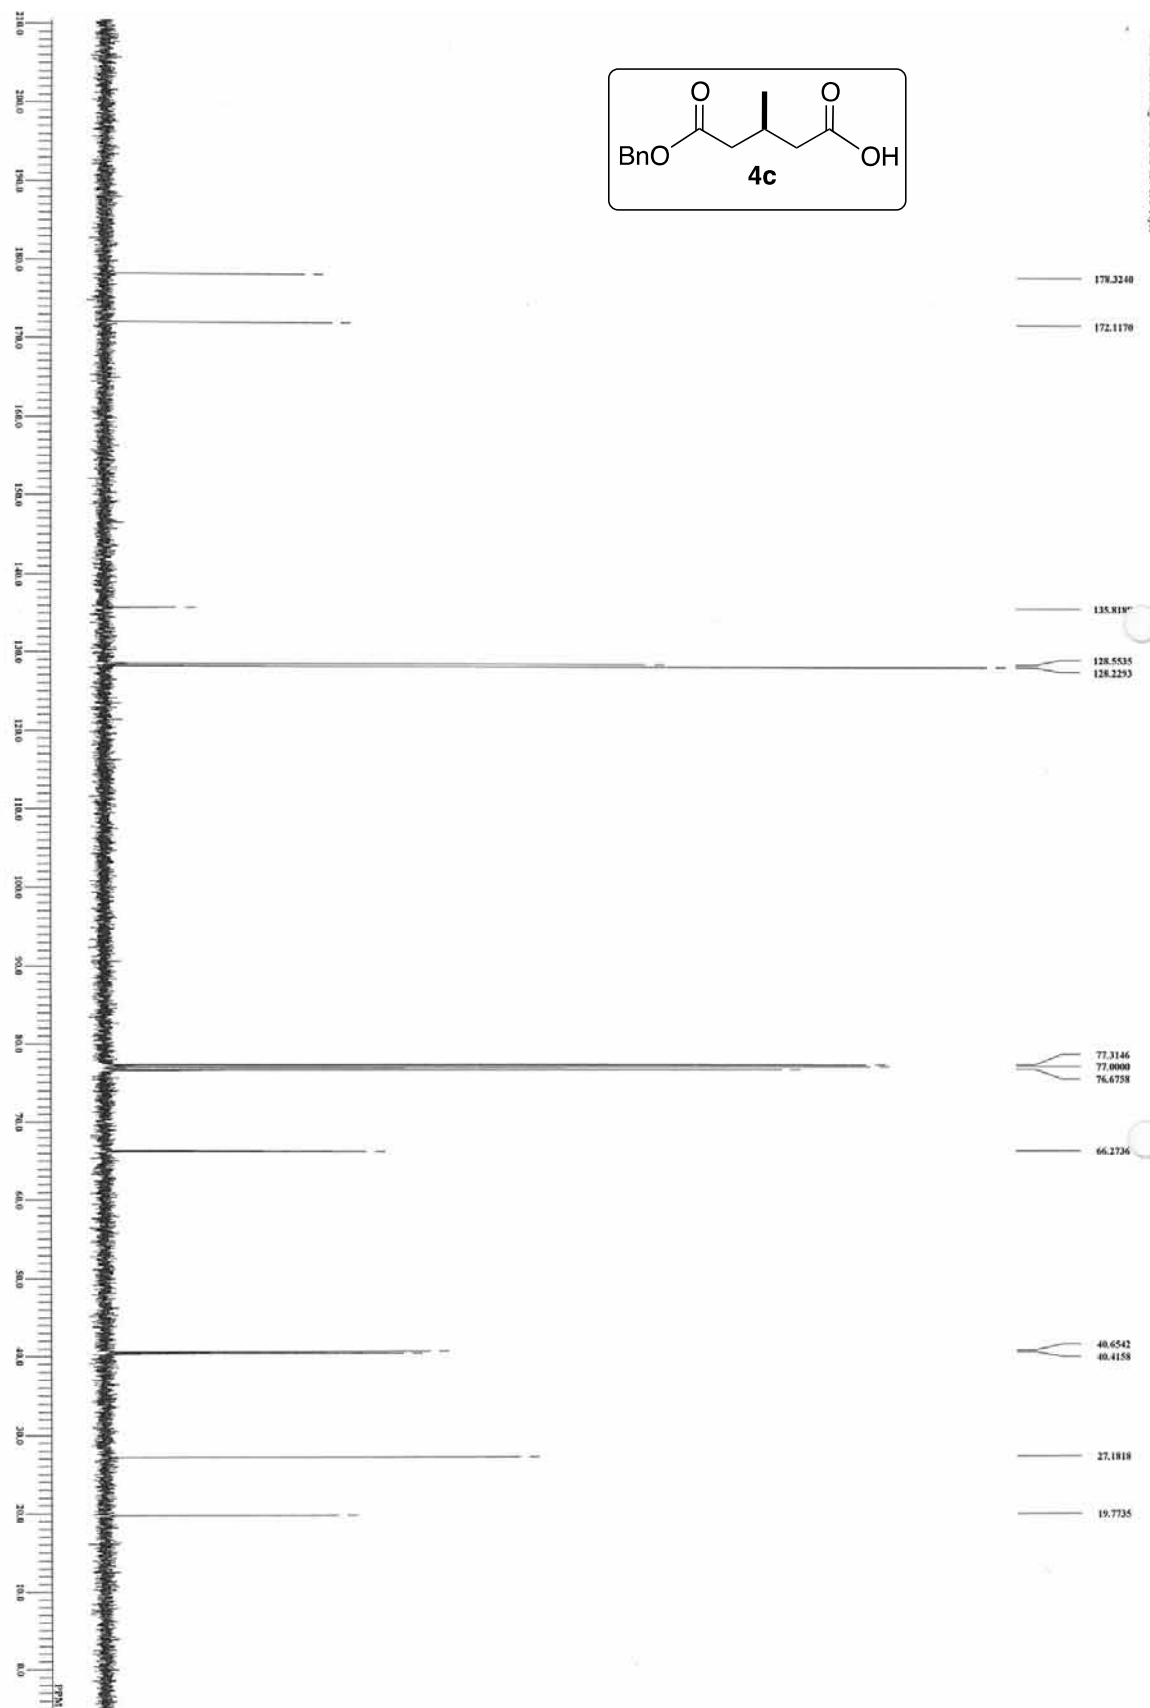



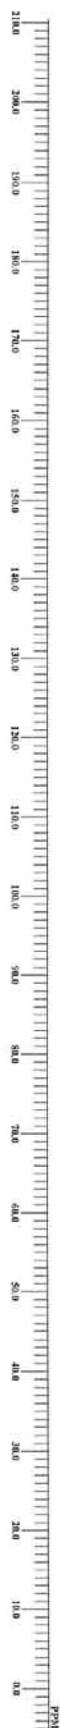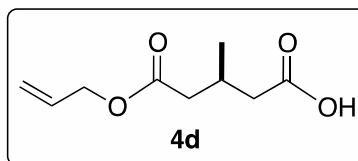

178.6672

171.9549

132.8336

118.2801

77.3146  
77.0000  
76.6758

65.1104

48.5970  
48.4540

27.1341

19.7734



<sup>13</sup>C NMR (400 MHz, DMSO-*d*<sub>6</sub>)  
 171.4305, 178.3526, 77.5339, 77.3242, 77.0000, 76.6854, 74.8929, 51.8764, 40.3205, 40.2823, 27.1246, 19.7448

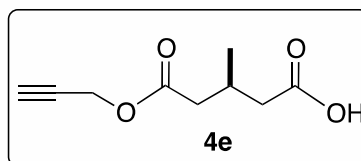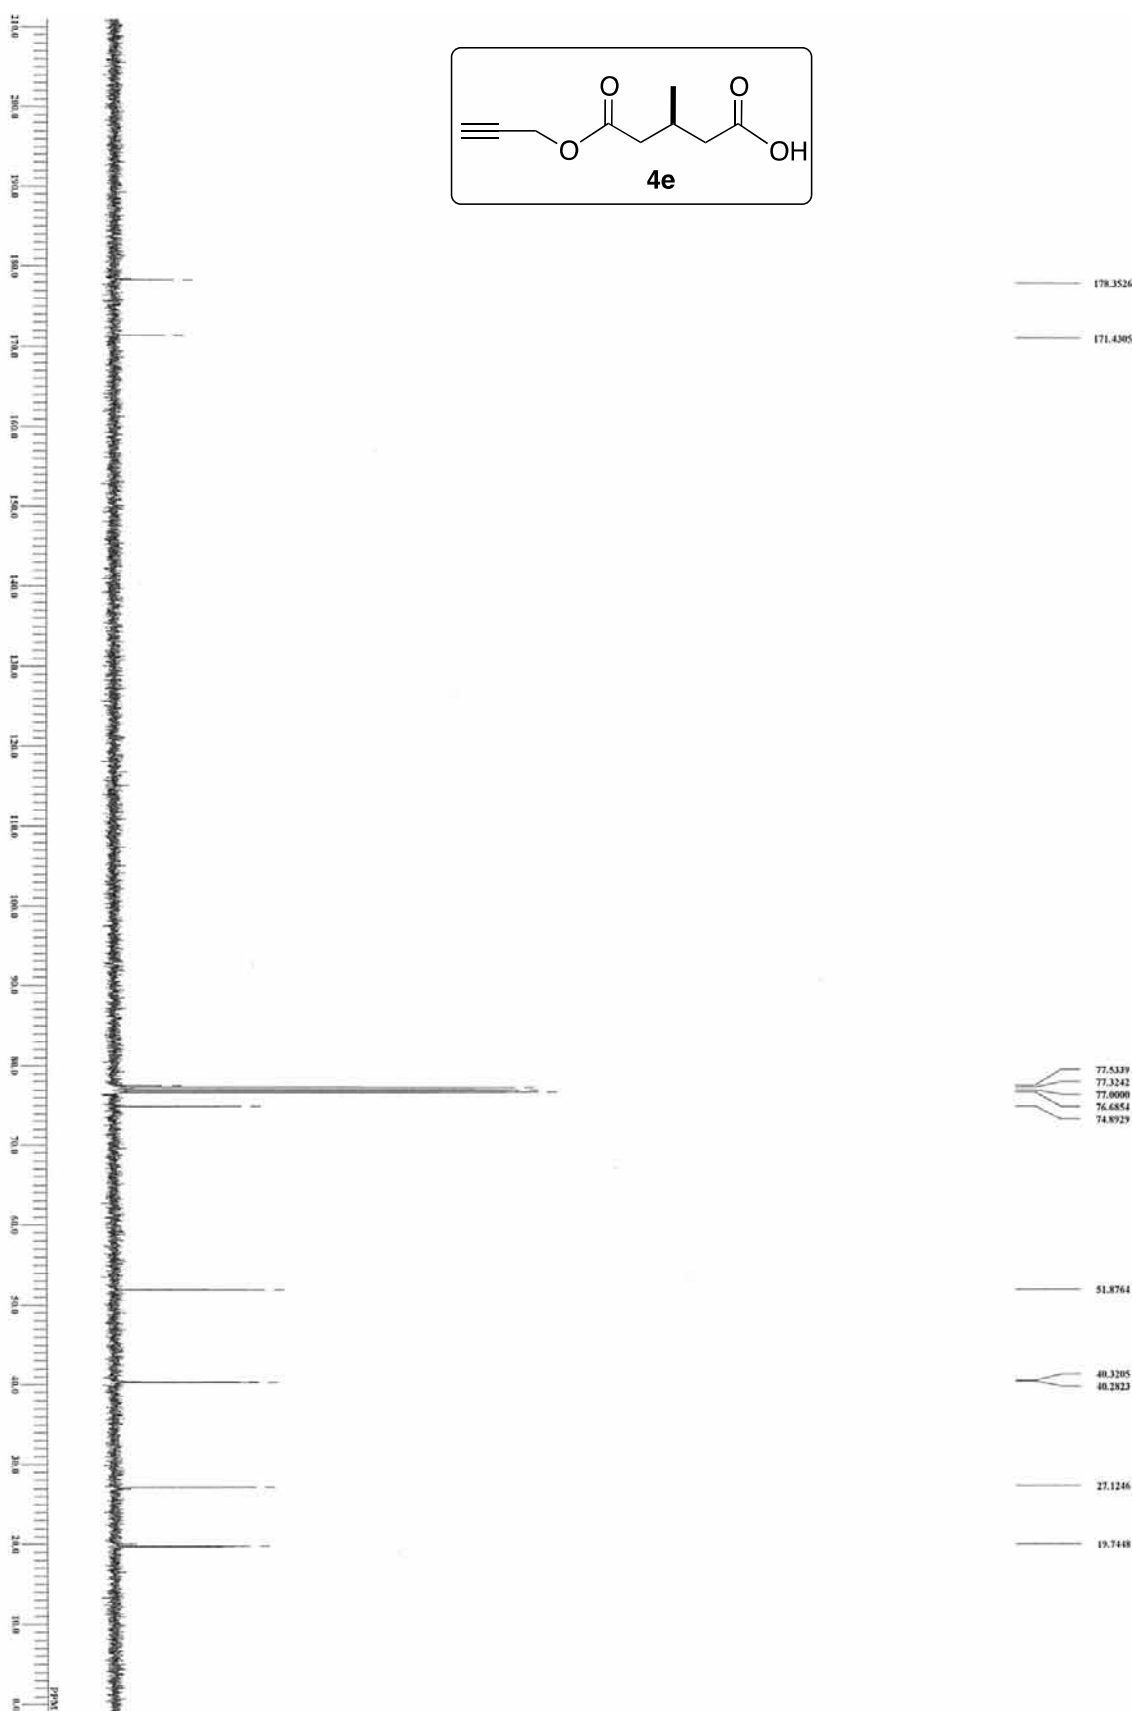

Supplement: Supplementary file 1 [file 4188265]
